# Supplementary material for: Detection and Architecture of Small Heat Shock Protein Monomers
Source: PubMed Central journal article supplement (PMC2850924; doi:10.1371/journal.pone.0009990), 2010-04-07
Supplement: pone.0009990.s001.pdf [file pone.0009990.s001.pdf]

| accession | group    | ACD_size | accession | group    | ACD_size | accession | group    | ACD_size |
|-----------|----------|----------|-----------|----------|----------|-----------|----------|----------|
| B9SA05    | plant    | 91       | B2AV59    | fungi    | 158      | C4ANX2    | bacOther | 88       |
| C0QVM3    | bacOther | 88       | Q5ZTH1    | bacA     | 87       | Q16S84    | animal   | 83       |
| O01718    | animal   | 101      | Q4WYW9    | fungi    | 124      | A8EX24    | bacOther | 89       |
| A1E463    | plant    | 90       | Q3R3S4    | bacOther | 89       | B9S3B4    | plant    | 90       |
| B0EHH3    | other    | 87       | A8NZF2    | fungi    | 120      | C4JZE7    | fungi    | 146      |
| A0K2I6    | bacOther | 90       | Q8Z2L8    | bacA     | 86       | B0TJF1    | bacA     | 86       |
| C1C473    | animal   | 83       | B6TD78    | plant    | 97       | B9S3B3    | plant    | 90       |
| Q1W289    | animal   | 83       | A9RDF3    | plant    | 80       | B9S3B2    | plant    | 90       |
| B6T6N6    | plant    | 90       | C0PTB9    | plant    | 92       | A7P4P7    | plant    | 90       |
| Q3STL4    | bacOther | 86       | Q86GU1    | animal   | 135      | B8FLL8    | bacOther | 88       |
| Q8DDJ3    | bacA     | 85       | A5BAN4    | plant    | 90       | A1CE36    | fungi    | 139      |
| Q061S4    | bacOther | 89       | B5YBV6    | bacOther | 89       | B9S1R8    | plant    | 90       |
| Q99RP2    | bacOther | 86       | B9SIR7    | plant    | 91       | B1L7F8    | archae   | 69       |
| Q16S85    | animal   | 91       | A0YRM5    | bacOther | 89       | C2WLY4    | bacOther | 90       |
| B7P7F7    | animal   | 84       | A5JBH0    | bacOther | 90       | B8FLL7    | bacOther | 88       |
| Q97W19    | archae   | 75       | Q82Q29    | bacOther | 89       | A7P4P8    | plant    | 90       |
| Q5KY05    | bacOther | 90       | A0JN13    | animal   | 83       | A7P4P9    | plant    | 90       |
| Q3M3M7    | bacOther | 89       | P15992    | fungi    | 95       | A6EJW7    | bacOther | 89       |
| B9ZK50    | bacOther | 89       | Q5LV07    | bacA     | 86       | Q40978    | plant    | 91       |
| B5YX93    | bacA     | 86       | P15990    | animal   | 83       | C0NER7    | fungi    | 101      |
| P81958    | bacOther | 89       | B8AJJ8    | plant    | 99       | Q1KS37    | animal   | 100      |
| C3MMU1    | archae   | 87       | C1Y3Q3    | bacOther | 87       | Q16JF9    | animal   | 83       |
| Q3BVG0    | bacOther | 89       | C0QLP0    | bacOther | 88       | B3M6E9    | animal   | 92       |
| A8N7T4    | fungi    | 91       | C0QLP1    | bacOther | 86       | Q7VQU7    | bacA     | 87       |
| Q884C5    | bacA     | 87       | B4ARN0    | bacB     | 87       | A5G8D6    | bacOther | 89       |
| Q6G5C1    | bacA     | 88       | Q66KZ0    | animal   | 83       | Q72QA2    | bacOther | 89       |
| A8DVB3    | animal   | 87       | B4IXA0    | animal   | 91       | C6T2L4    | plant    | 90       |
| C2UUUV0   | bacOther | 92       | B4IXA1    | animal   | 97       | Q6L891    | fungi    | 111      |
| Q8YEU3    | bacA     | 89       | Q647I7    | other    | 94       | Q72QA1    | bacOther | 87       |
| B7CUQ8    | bacOther | 90       | Q3AGM9    | bacB     | 89       | P82147    | animal   | 93       |
| B7CUQ9    | bacOther | 88       | C0ECQ3    | bacB     | 90       | B4NLH7    | animal   | 91       |
| B9AWU5    | bacOther | 107      | Q2C1M0    | bacA     | 85       | B3M6E6    | animal   | 116      |
| C1ZPF2    | bacOther | 88       | C0PJF1    | plant    | 80       | Q9N350    | animal   | 83       |
| A6V2U7    | bacA     | 87       | B6AYF6    | bacA     | 86       | Q1H248    | bacOther | 89       |
| B7P7F8    | animal   | 113      | A8P232    | animal   | 85       | Q7G754    | plant    | 100      |
| C4J643    | plant    | 82       | B5JL23    | bacOther | 85       | C4DED9    | bacOther | 89       |
| A0R3V7    | bacOther | 88       | B5JL22    | bacOther | 89       | B2FH35    | plant    | 90       |
| Q9DEU9    | animal   | 83       | A9NKK8    | plant    | 90       | A7VRF1    | bacOther | 89       |
| A5BWS0    | plant    | 104      | Q74FR8    | bacOther | 89       | B2FH37    | plant    | 90       |
| A1SBM6    | bacOther | 87       | B1QS45    | bacOther | 88       | B2FH36    | plant    | 90       |
| A9HCX4    | bacA     | 87       | B5NU19    | bacOther | 88       | C1DSQ8    | bacA     | 91       |
| Q4FXF7    | other    | 90       | A6E187    | bacA     | 86       | B2FH33    | plant    | 90       |
| A3WKG4    | bacA     | 86       | A9NPB3    | plant    | 90       | A0QE71    | bacOther | 87       |
| O86110    | bacA     | 85       | Q5U8W2    | animal   | 83       | A3CWD4    | archae   | 90       |
| C0ACF3    | bacOther | 88       | Q3B508    | bacOther | 73       | Q2LVT0    | bacOther | 89       |
| C0ACF2    | bacOther | 81       | O13225    | animal   | 87       | A5G1U1    | bacA     | 86       |
| B4B9Q4    | bacOther | 89       | C3G2J2    | bacOther | 90       | Q16JG7    | animal   | 83       |
| B6SRT5    | plant    | 91       | Q4RYB9    | animal   | 83       | B2FH39    | plant    | 90       |
| Q7NYU5    | bacB     | 90       | B3RCY4    | bacOther | 88       | B2FH38    | plant    | 90       |
| A4AV49    | bacOther | 89       | B1Z7U3    | bacA     | 87       | B5XT61    | bacA     | 86       |
| Q03DQ8    | bacOther | 90       | B1C2K1    | bacOther | 91       | Q0W4L5    | archae   | 90       |
| C1XLB0    | bacOther | 89       | B6BCR6    | bacA     | 86       | A8IXM7    | plant    | 96       |
| Q8L8R5    | plant    | 95       | B6W2V6    | bacOther | 92       | Q1H3V8    | bacA     | 88       |
| Q73UU8    | bacOther | 87       | Q1YK58    | bacA     | 88       | A5A8U4    | plant    | 87       |
| Q2LCS7    | animal   | 83       | A0KDX0    | bacB     | 92       | Q2L3S1    | plant    | 101      |
| C2CEW0    | bacOther | 90       | B7R1Y6    | archae   | 89       | Q7G566    | plant    | 85       |
| B6TDB5    | plant    | 90       | A0LHQ8    | bacOther | 91       | C3DJ87    | bacOther | 91       |
| Q3E986    | plant    | 79       | Q8YDY2    | bacA     | 88       | Q4XZX9    | other    | 96       |
| A2WKD5    | plant    | 90       | Q54W43    | other    | 143      | Q5V154    | archae   | 90       |
| A2WKD4    | plant    | 90       | A9VAH3    | other    | 133      | B4MY14    | animal   | 83       |
| A2WKD7    | plant    | 90       | C0UVN5    | bacOther | 89       | A5IVG8    | bacOther | 86       |
| Q21BA2    | bacA     | 88       | A6EY58    | bacOther | 89       | B5CA47    | bacA     | 86       |
| B4PCB3    | animal   | 83       | A2X0F6    | plant    | 90       | A9NPT1    | plant    | 92       |
| A2WKD3    | plant    | 91       | A9BVF2    | bacOther | 74       | B5XT60    | bacA     | 86       |
| A2WKD2    | plant    | 93       | A9HFK2    | bacOther | 87       | B5X8F0    | animal   | 87       |
| Q1BGH5    | bacB     | 92       | B3Q5Y9    | bacA     | 90       | C1ZL26    | bacOther | 89       |
| Q1BGH4    | bacOther | 88       | Q49ZX4    | bacOther | 87       | C1ZL27    | bacOther | 88       |
| B2H512    | bacOther | 90       | Q49ZX5    | bacOther | 90       | B4HKN7    | animal   | 116      |
| B7CDM9    | bacB     | 91       | B7AK63    | bacOther | 97       | B4HKN9    | animal   | 92       |
| A6SMR3    | fungi    | 98       | C1B6Y2    | bacOther | 87       | C1CX79    | bacOther | 88       |
| B9RV59    | plant    | 90       | A4BDK6    | bacA     | 85       | C2D8E4    | bacOther | 88       |
| A1KAK3    | bacOther | 90       | A4BDK7    | bacOther | 89       | Q3JNQ5    | bacOther | 88       |
| B2JMU8    | bacOther | 88       | A7YR80    | bacB     | 87       | Q3JNQ4    | bacB     | 91       |
| B2JMU9    | bacOther | 91       | B6XIB9    | bacOther | 88       | Q8XGW7    | bacA     | 86       |
| Q8TZC8    | archae   | 86       | B3X8S0    | bacA     | 86       | Q0KKB1    | animal   | 83       |

|        |          |     |        |          |     |        |          |     |
|--------|----------|-----|--------|----------|-----|--------|----------|-----|
| Q92VA9 | bacA     | 85  | A6TI56 | bacOther | 89  | B0AQN0 | bacOther | 91  |
| Q0KKB2 | animal   | 83  | A4T3Y7 | bacB     | 93  | A4HHP4 | other    | 90  |
| B4IYG9 | animal   | 93  | B9SI99 | plant    | 79  | Q41568 | plant    | 92  |
| A3WW64 | bacA     | 89  | Q20363 | animal   | 82  | B5JW68 | bacOther | 89  |
| B3ZA72 | bacOther | 91  | C3SLR2 | bacA     | 86  | Q9W6T3 | animal   | 83  |
| B6BVP0 | bacOther | 95  | B1ZS67 | bacOther | 88  | A5K5U4 | other    | 95  |
| B4UXB2 | bacOther | 89  | Q98H48 | bacA     | 88  | Q9BMF0 | other    | 95  |
| B5RM03 | bacOther | 89  | B0WEQ9 | animal   | 88  | Q6TAA6 | bacA     | 87  |
| B7GHV5 | bacOther | 90  | B0WEQ8 | animal   | 88  | A1BIT0 | bacOther | 89  |
| B7HQ56 | bacOther | 90  | B9MYM3 | plant    | 80  | Q2JYH4 | bacOther | 85  |
| B6T649 | plant    | 84  | A7GBM2 | bacOther | 88  | A8XDE7 | animal   | 83  |
| A4XBV1 | bacOther | 87  | A5ETZ1 | bacOther | 78  | Q16JG0 | animal   | 83  |
| A2P574 | bacA     | 85  | B0WEQ7 | animal   | 83  | Q747S3 | bacOther | 88  |
| B1GOA9 | bacOther | 88  | B0WEQ6 | animal   | 83  | B3L1E1 | other    | 95  |
| Q7XUW5 | plant    | 94  | B0WEQ5 | animal   | 110 | B8GPA9 | bacOther | 89  |
| A9W7W4 | bacB     | 89  | B0WEQ4 | animal   | 83  | C1ME18 | bacA     | 86  |
| A4XL56 | bacB     | 88  | C3HI16 | bacOther | 91  | Q1E147 | fungi    | 145 |
| A1ZM02 | bacOther | 88  | A5CX04 | bacOther | 74  | A1F590 | bacA     | 85  |
| Q2JAZ8 | bacOther | 87  | B5Y472 | other    | 81  | B1MUD3 | animal   | 83  |
| C3SLR7 | bacA     | 86  | B9ZP65 | bacOther | 89  | B4UZ10 | bacOther | 89  |
| A4XVW5 | bacA     | 87  | Q7NH34 | bacOther | 88  | C4KV04 | bacOther | 88  |
| A5K0L0 | other    | 96  | C4L9A6 | bacOther | 87  | C4KV05 | bacOther | 90  |
| C1CV16 | bacOther | 84  | A8TXB9 | bacA     | 87  | A4LA97 | plant    | 91  |
| A9DUT6 | bacA     | 86  | B9RQ27 | plant    | 90  | C3E2X3 | bacOther | 90  |
| B7U6N2 | other    | 95  | B7CDN0 | bacB     | 91  | B5EPP8 | bacOther | 87  |
| A5BGC0 | plant    | 90  | A3CX12 | archae   | 90  | A9G450 | bacA     | 86  |
| B9HKJ2 | plant    | 80  | A5ETZ0 | bacOther | 88  | Q3SQR8 | bacB     | 86  |
| B1Y2X7 | bacOther | 91  | C1WI58 | bacOther | 89  | Q3SQR9 | bacA     | 85  |
| A6DR96 | bacB     | 88  | C3GIF0 | bacOther | 91  | C3KJP8 | animal   | 83  |
| A6DR97 | bacOther | 84  | A2X2G6 | plant    | 97  | Q5H4F8 | bacOther | 89  |
| Q0S231 | bacOther | 88  | B2PZR1 | bacOther | 88  | A1E385 | animal   | 130 |
| A1VDV9 | bacOther | 81  | A0RDN1 | bacOther | 91  | C0S1A4 | fungi    | 131 |
| B0G2I5 | bacOther | 91  | Q1ATM9 | bacOther | 89  | A5IDZ2 | bacOther | 89  |
| B4LGS7 | animal   | 118 | Q13CS9 | bacA     | 88  | Q3R9G4 | bacOther | 89  |
| Q29F95 | animal   | 84  | B3J2G9 | bacOther | 91  | Q21Y84 | bacB     | 91  |
| Q2RFB2 | bacOther | 90  | A6X6X5 | bacA     | 88  | Q21KB7 | bacA     | 86  |
| Q29F97 | animal   | 98  | Q0TB21 | bacA     | 86  | A7P4Q5 | plant    | 90  |
| Q29F96 | animal   | 121 | Q2PPK4 | animal   | 83  | A7P4Q4 | plant    | 90  |
| Q13ZV9 | bacOther | 88  | Q2PPK2 | animal   | 83  | A7P4Q7 | plant    | 90  |
| Q13ZV8 | bacOther | 89  | Q2PPK3 | animal   | 83  | A7P4Q6 | plant    | 90  |
| Q29F93 | animal   | 93  | Q2PPK0 | animal   | 83  | B9TLQ5 | plant    | 102 |
| Q29F92 | animal   | 83  | Q569M7 | animal   | 83  | A7P4Q2 | plant    | 90  |
| B6TPF4 | plant    | 90  | C2KDN8 | bacOther | 90  | Q9HSD8 | archae   | 90  |
| B5IAD9 | archae   | 88  | A2ZD05 | plant    | 98  | A7P4Q8 | plant    | 90  |
| Q29F98 | animal   | 95  | A8YEZ9 | bacB     | 84  | B5FMC9 | bacA     | 86  |
| Q5MGN8 | animal   | 83  | C6TEC9 | plant    | 100 | B3M6F4 | animal   | 94  |
| Q6WHC0 | plant    | 90  | Q0RZ94 | bacOther | 87  | C7BVK7 | animal   | 82  |
| A3P9W2 | bacB     | 90  | A6TFY9 | bacA     | 86  | C1DQE3 | bacA     | 87  |
| Q5FNB9 | bacA     | 86  | Q47Y72 | bacA     | 94  | B3M6F0 | animal   | 84  |
| Q8R745 | bacOther | 89  | C2XBA8 | bacOther | 90  | A5GBZ4 | bacOther | 89  |
| B8EMF3 | bacOther | 88  | Q39HR5 | bacOther | 88  | A4MF28 | bacB     | 91  |
| A9MG56 | bacOther | 88  | Q39HR4 | bacOther | 91  | B3M6F3 | animal   | 99  |
| A8WLE6 | animal   | 83  | Q75BF9 | fungi    | 95  | A4MF27 | bacOther | 88  |
| Q943Q3 | plant    | 93  | C3X4S9 | bacOther | 90  | Q8MZU6 | other    | 84  |
| B2BY13 | plant    | 90  | O30851 | bacOther | 90  | B2A6N9 | bacOther | 92  |
| B7ZEP9 | plant    | 86  | Q4F877 | animal   | 83  | B5XQZ7 | bacOther | 90  |
| A9A2S7 | archae   | 90  | A1SV28 | bacOther | 89  | B7P624 | animal   | 84  |
| A8H3U4 | bacA     | 86  | A8Y0T5 | animal   | 83  | B9KNG2 | bacA     | 86  |
| A4CMN6 | bacOther | 89  | A5BP28 | plant    | 93  | B9BSJ8 | bacOther | 85  |
| A0QM89 | bacB     | 90  | P0C056 | bacA     | 86  | B6FG30 | bacA     | 86  |
| C4G297 | bacOther | 92  | A8Q2A9 | animal   | 86  | Q4P7N2 | fungi    | 141 |
| B7ZEP5 | plant    | 84  | C1BPW1 | animal   | 86  | B1LL12 | bacA     | 86  |
| B7ZEP6 | plant    | 82  | A8MBU8 | archae   | 88  | B7AVH7 | bacOther | 92  |
| B3R4R2 | bacOther | 88  | B4LGS8 | animal   | 96  | B1LL11 | bacA     | 86  |
| B3R4R1 | bacOther | 91  | B4LGS9 | animal   | 90  | Q92M33 | bacA     | 87  |
| Q1WLA9 | bacOther | 73  | B4LGS6 | animal   | 84  | A4SCX8 | bacOther | 89  |
| Q31KI8 | bacOther | 89  | C3EKA2 | bacOther | 92  | C0YKG7 | bacOther | 89  |
| A8LJ34 | bacB     | 89  | B5NIU8 | bacOther | 88  | B8CY41 | bacOther | 89  |
| A2SHH7 | bacOther | 89  | Q0G4R1 | bacA     | 88  | Q8LBT4 | plant    | 79  |
| B1UIZ7 | bacOther | 90  | B7QY10 | bacA     | 86  | A8A6E7 | bacA     | 86  |
| A7VJH1 | plant    | 96  | B0SY21 | bacA     | 86  | A4GAF6 | bacA     | 86  |
| C4CMU2 | bacOther | 97  | C4CZ90 | bacOther | 92  | C1DEN7 | bacOther | 89  |
| B6TXB5 | plant    | 90  | A3JND0 | bacA     | 85  | B1KAX5 | bacOther | 88  |
| A4ABG0 | bacA     | 86  | C0C4C3 | bacOther | 91  | B1KAX4 | bacB     | 92  |
| Q7A030 | bacOther | 86  | A9NU13 | plant    | 90  | C3L3U7 | bacOther | 91  |
| B8I9W5 | bacA     | 86  | Q41560 | plant    | 90  | A1E2A9 | plant    | 90  |

|        |          |     |        |          |     |        |          |     |
|--------|----------|-----|--------|----------|-----|--------|----------|-----|
| C3J648 | bacOther | 88  | Q551G1 | other    | 147 | Q0RZ81 | bacOther | 89  |
| A5AQ47 | plant    | 90  | B7ZEq0 | plant    | 94  | B2I5Z4 | bacOther | 89  |
| Q07160 | animal   | 82  | A9SQV2 | plant    | 90  | P46732 | bacOther | 87  |
| B1JZ10 | bacOther | 91  | Q2QJL7 | bacA     | 86  | O31288 | bacOther | 93  |
| C2MUP3 | bacOther | 90  | Q54I91 | other    | 93  | Q2LPJ5 | bacOther | 88  |
| C1XR11 | bacOther | 88  | Q88HP0 | bacOther | 88  | Q2LPJ6 | bacOther | 89  |
| A9NL04 | plant    | 82  | C0XDX5 | bacOther | 90  | Q9M6R2 | plant    | 90  |
| Q0KBR3 | bacOther | 91  | B9RQ29 | plant    | 79  | A3MX90 | archae   | 75  |
| A3N813 | bacOther | 90  | A3W4R6 | bacA     | 86  | B1N203 | bacB     | 91  |
| A3N812 | bacOther | 88  | Q39818 | plant    | 82  | A7QCE2 | plant    | 90  |
| Q5ZTH0 | bacOther | 89  | Q39819 | plant    | 95  | B7RD54 | bacOther | 89  |
| A6UIE4 | bacA     | 85  | A2SHG2 | bacOther | 88  | A8KGY5 | bacOther | 90  |
| A6ZYC9 | fungi    | 93  | C6TMV0 | plant    | 94  | B4JCI5 | animal   | 91  |
| C1BJV2 | animal   | 83  | B9R949 | plant    | 79  | A7AVD6 | other    | 86  |
| B1MV71 | animal   | 94  | B5Y3Y4 | other    | 84  | B6R764 | bacA     | 86  |
| Q9ZP25 | plant    | 83  | Q9GSB6 | animal   | 83  | Q1J023 | bacOther | 84  |
| Q7Q723 | animal   | 83  | Q0I6F9 | bacOther | 103 | Q17849 | animal   | 135 |
| Q7Q724 | animal   | 83  | Q5B7C5 | fungi    | 126 | A9B5N0 | bacOther | 89  |
| Q54VP4 | other    | 89  | B3WBX7 | bacOther | 90  | A0LR75 | bacOther | 88  |
| Q2G6S0 | bacA     | 85  | A6PQY9 | bacOther | 89  | Q75F56 | fungi    | 95  |
| Q19227 | animal   | 83  | B9GVE8 | plant    | 82  | B7Y7J2 | bacOther | 90  |
| B6U3J2 | plant    | 93  | A6UT17 | archae   | 90  | Q88HN9 | bacOther | 91  |
| Q79K03 | bacOther | 90  | B8HJQ7 | bacOther | 89  | B3C8N3 | bacOther | 92  |
| A0K166 | bacB     | 92  | B3NCF1 | animal   | 99  | A5YRZ1 | plant    | 90  |
| C0PSE6 | plant    | 86  | C2FDJ8 | bacOther | 90  | B9NTK2 | bacA     | 86  |
| B8HWL6 | bacOther | 89  | B4E189 | bacOther | 90  | B3H5Q4 | plant    | 91  |
| A9ZZC0 | bacA     | 86  | B1YMT1 | bacOther | 91  | C1SIE4 | bacOther | 89  |
| C2CYT6 | bacOther | 90  | B1YMT0 | bacOther | 88  | B6B2L1 | bacA     | 86  |
| C2R7P9 | bacOther | 90  | C1XR05 | bacOther | 69  | C7BVQ8 | animal   | 90  |
| Q7CPF1 | bacA     | 86  | A5EHH6 | bacB     | 89  | O82825 | bacOther | 89  |
| A0QPJ9 | bacB     | 90  | A3KWF7 | bacA     | 87  | A9CKC3 | bacA     | 90  |
| Q89H22 | bacOther | 87  | Q9Z287 | bacB     | 89  | B5Q694 | bacA     | 86  |
| Q2S165 | bacB     | 89  | A9UEZ0 | animal   | 116 | B3QF80 | bacA     | 87  |
| B8NXF5 | fungi    | 90  | P15991 | animal   | 83  | C2QSK3 | bacOther | 92  |
| A5CVD9 | other    | 90  | B8DPI1 | bacOther | 81  | C2LFA5 | bacOther | 88  |
| A1VLW0 | bacOther | 91  | A8GMS9 | bacOther | 85  | B8BH26 | plant    | 84  |
| C0BJE5 | bacOther | 89  | Q6N5S5 | bacOther | 87  | Q52L78 | animal   | 83  |
| Q1YY52 | bacA     | 87  | B2TGA3 | bacOther | 91  | A0QG70 | bacOther | 87  |
| B2N6C3 | bacA     | 86  | A0T073 | animal   | 83  | A5L6E9 | bacA     | 85  |
| B1EZ46 | bacOther | 91  | A9UEZ2 | animal   | 96  | A0QG72 | bacOther | 87  |
| C3PMX1 | bacOther | 85  | A9CUG3 | bacOther | 89  | B3X8S1 | bacA     | 86  |
| B2II78 | bacOther | 89  | Q60HG8 | animal   | 83  | A8J2Z3 | plant    | 189 |
| A9FKI0 | bacOther | 89  | B9XB80 | bacOther | 93  | C2T105 | bacOther | 90  |
| B9GTI4 | plant    | 94  | A9UEZ3 | animal   | 84  | B6EGS9 | bacA     | 86  |
| B8N2K7 | fungi    | 143 | B9HAX6 | plant    | 72  | C6DGL0 | bacA     | 86  |
| Q11YJ1 | bacOther | 91  | C3C1V4 | bacOther | 92  | Q7G755 | plant    | 85  |
| A1RXC6 | archae   | 72  | B6V9W9 | other    | 95  | A5UPT0 | bacB     | 89  |
| Q9ZW31 | plant    | 90  | B9H8R6 | plant    | 85  | B5XD67 | animal   | 80  |
| Q1MT33 | bacOther | 89  | Q39929 | plant    | 90  | A6L7D4 | bacOther | 96  |
| A5BGB5 | plant    | 90  | Q5RAB0 | animal   | 142 | B1Z4J0 | bacOther | 73  |
| Q1AY86 | bacOther | 87  | Q3SJ47 | bacOther | 88  | B1Y2X8 | bacOther | 88  |
| A5BGB8 | plant    | 91  | Q8IQW5 | animal   | 124 | B7JAY7 | bacOther | 89  |
| B9ZHA4 | archae   | 90  | C4R9G1 | fungi    | 97  | A8I6R6 | plant    | 91  |
| B9Z998 | archae   | 73  | A9EIB4 | bacA     | 86  | Q4L8Q4 | bacOther | 86  |
| C0C840 | bacOther | 91  | Q711Q1 | animal   | 82  | A3TTS9 | bacA     | 86  |
| Q62H41 | bacOther | 88  | A7K7F4 | bacOther | 107 | B7Q2C4 | animal   | 83  |
| B3PDH2 | bacA     | 86  | C3GIG1 | bacOther | 90  | Q9SE12 | plant    | 86  |
| Q2Y9U8 | bacOther | 89  | B2AYV7 | fungi    | 100 | Q9SE11 | plant    | 86  |
| C4IOD5 | bacA     | 86  | C3B351 | bacOther | 92  | B7MGA7 | bacA     | 86  |
| Q8FXL4 | bacA     | 88  | B6KN75 | other    | 89  | A2ZNZ7 | plant    | 91  |
| C2VT96 | bacOther | 80  | A5TMA0 | bacOther | 88  | Q7JP52 | animal   | 83  |
| B0SYI5 | bacB     | 89  | B0CVA2 | fungi    | 120 | P68405 | animal   | 83  |
| B9QBE4 | other    | 95  | Q8Z9V5 | bacA     | 86  | P68406 | animal   | 83  |
| Q13ZU0 | bacOther | 90  | A8A6E6 | bacA     | 86  | B0K455 | bacOther | 89  |
| Q2FLP2 | archae   | 89  | B3J2F9 | bacOther | 90  | A9MJW8 | bacA     | 86  |
| B5FK56 | bacOther | 88  | Q9ZSR5 | plant    | 92  | A9MJW9 | bacA     | 86  |
| Q18J73 | archae   | 90  | Q8EMZ6 | bacOther | 89  | A4EB60 | bacOther | 88  |
| C1C1Z3 | animal   | 86  | Q6MJP8 | bacB     | 86  | P72977 | bacOther | 89  |
| C0FHS9 | bacOther | 91  | Q20660 | animal   | 83  | Q39QP6 | bacOther | 88  |
| Q3IUT4 | archae   | 73  | A3X699 | bacA     | 86  | A4BWG1 | bacOther | 73  |
| A6B5Z8 | bacA     | 85  | O03993 | plant    | 87  | B3JHD1 | bacOther | 90  |
| C4CRI8 | bacOther | 89  | B7QNN7 | animal   | 84  | C1RL68 | bacOther | 88  |
| B3IKH3 | bacA     | 86  | B3EHR2 | bacOther | 89  | Q29EN7 | animal   | 83  |
| B3YT35 | bacOther | 90  | Q1BFF6 | bacB     | 90  | Q8W541 | plant    | 90  |
| B7NQY6 | bacA     | 86  | B9ST51 | plant    | 94  | Q5UZZ7 | archae   | 85  |
| Q8L543 | plant    | 91  | Q12988 | animal   | 102 | Q17MD5 | animal   | 84  |

|        |          |     |        |          |     |        |          |     |
|--------|----------|-----|--------|----------|-----|--------|----------|-----|
| Q17MD6 | animal   | 123 | A0RDP1 | bacOther | 90  | Q31UU5 | bacA     | 86  |
| Q5MGP0 | animal   | 83  | Q72IL2 | bacOther | 88  | B8C1I4 | other    | 83  |
| B9I5V3 | plant    | 78  | C4G9S2 | bacOther | 91  | Q052T1 | bacOther | 85  |
| Q6Q221 | bacOther | 89  | B4RI57 | bacA     | 86  | A1ULF0 | bacOther | 88  |
| A4VLP2 | bacOther | 89  | B1WW89 | bacOther | 89  | C3C1W6 | bacOther | 90  |
| Q9EPF3 | animal   | 83  | Q72IL6 | bacOther | 85  | Q8Y2Y1 | bacOther | 90  |
| B2P433 | bacA     | 86  | A9ACP9 | bacOther | 91  | B6YQH1 | bacOther | 90  |
| B2P432 | bacA     | 86  | O28308 | archae   | 89  | A6QJM7 | bacOther | 86  |
| B6TR54 | plant    | 83  | C6T2W1 | plant    | 90  | Q5X395 | bacA     | 87  |
| B9KBT5 | bacOther | 89  | Q5K552 | bacOther | 89  | A9H1P5 | bacA     | 86  |
| B5ZMX2 | bacA     | 90  | B2HJW1 | bacB     | 88  | Q39930 | plant    | 90  |
| Q53M11 | plant    | 98  | C2L005 | bacOther | 91  | C4AV23 | bacOther | 90  |
| Q6LZE5 | archae   | 90  | Q4SQ32 | animal   | 86  | A5JV80 | animal   | 83  |
| B6FG29 | bacA     | 86  | B4SY77 | bacA     | 86  | Q545F4 | animal   | 83  |
| A0JWT0 | bacB     | 90  | Q2S022 | bacOther | 89  | A4U381 | bacB     | 89  |
| B0VIW3 | bacOther | 89  | B8FEZ9 | bacOther | 89  | Q6CYV2 | bacA     | 86  |
| C6DGL1 | bacA     | 86  | Q4PLA7 | other    | 90  | Q7Y099 | plant    | 81  |
| P46516 | plant    | 90  | C0UXW9 | bacOther | 87  | C2BHL7 | bacOther | 88  |
| Q9HJU9 | archae   | 84  | Q13ZT8 | bacOther | 89  | A5JV82 | animal   | 93  |
| B4WP44 | bacOther | 89  | Q5MGL1 | animal   | 83  | A6T8V6 | bacOther | 90  |
| A5BXI3 | plant    | 90  | A2YBC0 | plant    | 96  | B9S5K5 | plant    | 90  |
| Q5S1X5 | animal   | 91  | B1Z465 | bacOther | 88  | A1T1U5 | bacB     | 90  |
| A5E8C1 | bacA     | 90  | B1Z464 | bacOther | 91  | Q70LH1 | bacOther | 90  |
| B0QAF0 | bacOther | 91  | B1Z466 | bacOther | 89  | Q3RID5 | bacOther | 89  |
| B1JZ09 | bacOther | 88  | Q2V9E8 | archae   | 90  | A6U5H9 | bacA     | 92  |
| A8FWQ2 | bacA     | 87  | Q2RMU6 | bacA     | 86  | B4PZG1 | animal   | 124 |
| B2SCM0 | bacA     | 88  | A1DM46 | fungi    | 139 | B0NXR6 | bacOther | 91  |
| Q0F3F6 | bacB     | 89  | A4Y7C8 | bacA     | 86  | B6SLV6 | plant    | 94  |
| A9UEZ1 | animal   | 95  | A6L882 | bacOther | 92  | A5J5Y3 | bacOther | 90  |
| B4AW15 | bacOther | 89  | A7NS20 | bacB     | 89  | Q18F21 | archae   | 89  |
| Q2T2U1 | bacOther | 90  | B6U8I5 | plant    | 82  | C3KWZ7 | bacOther | 88  |
| A9NL13 | plant    | 90  | B1BC70 | bacOther | 90  | Q16EM9 | animal   | 121 |
| O13224 | animal   | 83  | A7NRF5 | bacOther | 88  | A9DU04 | bacA     | 86  |
| C4QAN0 | animal   | 73  | Q27JQ1 | fungi    | 160 | A5D4M7 | bacOther | 84  |
| B2ILF6 | bacA     | 86  | Q27JQ0 | fungi    | 86  | A9NQY5 | plant    | 94  |
| Q4C0I5 | bacOther | 89  | C1FUQ2 | bacOther | 88  | A6YFM2 | bacOther | 88  |
| A6L624 | bacOther | 92  | P02486 | animal   | 83  | Q1JXX2 | bacOther | 88  |
| B9ZB33 | archae   | 90  | B4NYS5 | animal   | 91  | Q1JXX1 | bacOther | 86  |
| Q81DY2 | bacOther | 90  | Q729B1 | bacOther | 85  | A6BWH1 | bacA     | 86  |
| A4WLV2 | archae   | 88  | Q729B0 | bacOther | 88  | B0KBE9 | bacOther | 89  |
| C1UL57 | bacOther | 89  | B9PSE4 | other    | 89  | B5PR01 | bacA     | 86  |
| Q6PFS1 | animal   | 95  | A2XEW8 | plant    | 90  | Q4J8A6 | archae   | 87  |
| Q28UK0 | bacA     | 86  | A2YAR7 | plant    | 84  | C1NG07 | bacA     | 86  |
| Q208N7 | plant    | 96  | A1JT69 | bacA     | 86  | A3YTY0 | bacOther | 89  |
| C0QTQ3 | bacOther | 89  | Q13QP6 | bacOther | 92  | C4B4U4 | animal   | 83  |
| P40920 | fungi    | 127 | Q6Q2J1 | fungi    | 138 | Q6KCP0 | animal   | 83  |
| A0B581 | archae   | 68  | B4BLY9 | bacOther | 90  | Q6KCP2 | animal   | 83  |
| B5HD48 | bacOther | 89  | A4ZY18 | bacB     | 88  | Q86H60 | other    | 122 |
| B2VZY7 | fungi    | 141 | C2EVW1 | bacOther | 90  | Q5EBG6 | animal   | 83  |
| B3BDG1 | bacA     | 86  | A4I4V9 | other    | 90  | Q2LPQ5 | bacOther | 89  |
| Q0PQ92 | bacOther | 89  | Q541V4 | plant    | 86  | B6TG53 | plant    | 91  |
| B4QKX4 | animal   | 83  | B1MJW5 | bacB     | 90  | A3Z3G9 | bacOther | 90  |
| B6B9M0 | bacA     | 86  | C2E3H8 | bacOther | 90  | O48865 | plant    | 89  |
| C5H4M8 | plant    | 109 | A4F628 | bacOther | 91  | B2SEF1 | bacB     | 87  |
| A7HFM4 | bacOther | 89  | Q5N1C6 | bacOther | 89  | C2XTK9 | bacOther | 93  |
| Q5V5N7 | archae   | 79  | B2ZHW3 | animal   | 83  | Q312K1 | bacOther | 87  |
| Q000T2 | animal   | 83  | A1WAG3 | bacOther | 90  | Q2W081 | bacOther | 86  |
| O93591 | animal   | 83  | C6T330 | plant    | 95  | A2FKC5 | other    | 87  |
| B9SLT1 | plant    | 94  | B1G457 | bacOther | 81  | Q82QP6 | bacOther | 89  |
| C1YAE8 | bacB     | 90  | B8GYN3 | bacA     | 86  | C0QQJ8 | bacOther | 86  |
| B2NKC6 | bacA     | 86  | A7ALU6 | bacOther | 92  | B5ICU4 | archae   | 75  |
| B3T5H3 | archae   | 88  | Q6W3L1 | bacOther | 89  | Q5KXZ2 | bacOther | 91  |
| B2HFL1 | bacOther | 87  | B5YFG1 | bacOther | 89  | A9RN10 | plant    | 96  |
| C2MDW8 | bacOther | 93  | B1UIX1 | bacOther | 91  | Q8KB28 | bacB     | 89  |
| B2JTK0 | bacOther | 89  | A6X7F7 | bacOther | 89  | B5EDM9 | bacB     | 88  |
| C2JUC9 | bacOther | 90  | B8AWD6 | plant    | 96  | Q88U58 | bacOther | 88  |
| A7JP63 | bacB     | 87  | Q1HPN2 | animal   | 83  | Q6Z2L3 | plant    | 90  |
| Q8XC04 | bacA     | 86  | Q1NI80 | bacOther | 88  | Q1M4B8 | bacA     | 85  |
| A7HJ86 | bacOther | 89  | A3Q5U9 | bacOther | 88  | B3QR17 | bacB     | 89  |
| B1J527 | bacA     | 87  | C0UVN7 | bacOther | 89  | B9YYM1 | bacOther | 90  |
| B7RN65 | bacA     | 86  | B4HKP3 | animal   | 100 | B7FJK9 | plant    | 96  |
| Q1C3K9 | bacA     | 86  | A6E1D0 | bacA     | 86  | Q1ICW3 | bacA     | 88  |
| Q5U130 | animal   | 111 | B4HKP1 | animal   | 83  | B4H1M2 | animal   | 121 |
| B6K1I9 | fungi    | 89  | A6X7F9 | bacOther | 89  | B4H1M3 | animal   | 84  |
| B6TM52 | plant    | 114 | B7PCG5 | animal   | 109 | B4H1M7 | animal   | 83  |
| C3VMP2 | fungi    | 151 | Q31UU6 | bacA     | 86  | B4H1M4 | animal   | 84  |

|        |          |     |        |          |     |        |          |     |
|--------|----------|-----|--------|----------|-----|--------|----------|-----|
| B4H1M5 | animal   | 93  | P06581 | animal   | 82  | A6EPE1 | bacOther | 92  |
| Q20JZ7 | bacOther | 89  | Q17268 | animal   | 85  | B8M4F4 | fungi    | 145 |
| B9LBV0 | bacOther | 89  | B8MTE1 | fungi    | 132 | A0FLR8 | animal   | 86  |
| Q01545 | plant    | 92  | Q3ISC4 | archae   | 87  | Q95P25 | animal   | 83  |
| A3ZTJ5 | bacOther | 89  | B2BXU3 | plant    | 91  | Q95P27 | animal   | 105 |
| A8IJR8 | bacA     | 89  | A2PL49 | bacA     | 85  | B5EAT4 | bacOther | 89  |
| Q2VNM9 | bacA     | 90  | A1SPJ7 | bacOther | 87  | B4FT59 | plant    | 90  |
| A1SUB1 | bacOther | 73  | B3QMB3 | bacOther | 89  | A3TWK2 | bacA     | 85  |
| B7G195 | other    | 83  | B7Y7L1 | bacOther | 91  | A2VNG6 | bacB     | 97  |
| A8I6S0 | plant    | 91  | B9L593 | bacOther | 92  | A9SWK2 | plant    | 91  |
| Q8IB02 | other    | 95  | Q04757 | animal   | 117 | B7CWI2 | bacOther | 90  |
| B1Z8L2 | bacOther | 87  | Q63QV7 | bacOther | 88  | A7FPA7 | bacA     | 86  |
| Q73NX3 | bacOther | 89  | Q63QV6 | bacB     | 91  | C1N7X5 | plant    | 95  |
| A9Z5T3 | bacA     | 86  | B1Q039 | animal   | 83  | Q84J50 | plant    | 90  |
| A9Z5T2 | bacA     | 86  | Q97VL9 | archae   | 87  | Q94GC7 | plant    | 79  |
| A1RSY5 | archae   | 87  | C6T5M6 | plant    | 90  | C2NH89 | bacOther | 90  |
| B9TLD5 | plant    | 89  | Q9JK92 | animal   | 142 | B6K549 | fungi    | 89  |
| Q663X0 | bacA     | 86  | B9HP05 | plant    | 90  | C2S3A0 | bacOther | 90  |
| Q7MQJ3 | bacA     | 85  | B9HP04 | plant    | 90  | A7PIJ1 | plant    | 90  |
| A0PQK0 | bacOther | 87  | P06904 | animal   | 83  | A7PIJ0 | plant    | 90  |
| B8FPS7 | bacOther | 88  | A9LB73 | bacOther | 88  | A7PIJ2 | plant    | 90  |
| C0EYQ0 | bacOther | 91  | A4EEN7 | bacA     | 86  | B5QJN6 | bacOther | 90  |
| C0EYQ1 | bacOther | 91  | C4CK62 | bacOther | 88  | A8HNU7 | plant    | 121 |
| A9URS8 | other    | 89  | A6YFL9 | bacB     | 90  | A2WLG6 | plant    | 94  |
| B6ZQM7 | bacA     | 86  | B0EFK9 | other    | 87  | C2GMP7 | bacOther | 90  |
| C4CJI5 | bacOther | 92  | A3WSV0 | bacOther | 87  | B2FH34 | plant    | 90  |
| B7P6K1 | animal   | 84  | Q05VC6 | bacOther | 103 | C3P8X0 | bacOther | 91  |
| A5FQW0 | bacOther | 89  | A0Y307 | bacA     | 88  | C1ZQ54 | bacOther | 89  |
| B3QZ37 | bacOther | 89  | B5F8A2 | bacOther | 88  | Q6QX37 | animal   | 83  |
| B2GIE8 | bacOther | 89  | B4DNC2 | animal   | 83  | A4FFV8 | bacOther | 90  |
| B4SY76 | bacA     | 86  | B8IR16 | bacA     | 87  | A9W363 | bacA     | 84  |
| Q05713 | animal   | 83  | C0U5K6 | bacOther | 88  | A3NPD9 | bacB     | 90  |
| Q26999 | other    | 95  | A9ACQ0 | bacOther | 88  | C1SPN3 | bacOther | 89  |
| C0PPC9 | plant    | 89  | Q99PR8 | animal   | 83  | C1SPN2 | bacOther | 89  |
| Q5UYH0 | archae   | 90  | Q2JTG2 | bacOther | 88  | C1KGS9 | plant    | 95  |
| B4FQS7 | plant    | 84  | A8LQE3 | bacA     | 86  | B4WDT3 | bacB     | 89  |
| B9S1R4 | plant    | 90  | C0DAE1 | bacOther | 91  | C3HI28 | bacOther | 90  |
| Q58FS1 | fungi    | 152 | Q1Q416 | bacOther | 89  | C1SJF7 | bacOther | 88  |
| Q8Z017 | bacB     | 89  | Q13XU2 | bacB     | 90  | Q03I62 | bacOther | 90  |
| B0DCN9 | fungi    | 91  | Q1Q418 | bacOther | 88  | C0FZW8 | bacOther | 91  |
| Q9T2L4 | plant    | 95  | Q1Q419 | bacOther | 88  | B6VVT1 | bacOther | 93  |
| Q9T2L5 | plant    | 95  | Q8IES0 | other    | 91  | Q6USC0 | animal   | 82  |
| B9LTV5 | archae   | 90  | B9T5S1 | plant    | 90  | Q0FQI6 | bacA     | 86  |
| A9RGS6 | plant    | 90  | B9LSK9 | archae   | 87  | B7J4U6 | bacOther | 89  |
| Q2FQN2 | archae   | 90  | B9T5S2 | plant    | 90  | C4CQ59 | bacOther | 89  |
| C2Z7N4 | bacOther | 92  | B5XDH1 | animal   | 86  | B8B6N0 | plant    | 86  |
| B2SOE9 | bacOther | 89  | B6TIP9 | plant    | 89  | Q7RW96 | fungi    | 140 |
| C2CDX4 | bacA     | 85  | Q3KF30 | bacA     | 86  | Q3JBB5 | bacOther | 89  |
| B9CGY5 | bacOther | 88  | B3LGB2 | fungi    | 93  | B5ISM2 | archae   | 89  |
| B9CGY6 | bacOther | 91  | B8DQK5 | bacOther | 100 | B7JU82 | bacOther | 90  |
| B8E1J2 | bacOther | 89  | B0BWV0 | bacOther | 85  | B5DGI9 | animal   | 86  |
| B1SGD8 | bacOther | 88  | Q9XDG8 | bacB     | 90  | C2SJK2 | bacOther | 93  |
| A0NRY2 | bacA     | 90  | B4FXU3 | plant    | 82  | A1RRR8 | archae   | 75  |
| Q23640 | plant    | 86  | A8M577 | bacOther | 87  | A7FPA8 | bacA     | 86  |
| P41316 | animal   | 83  | C4QA74 | animal   | 82  | B9T7G2 | plant    | 91  |
| A8KAH6 | animal   | 83  | B0UJC9 | bacA     | 87  | B9T7G1 | plant    | 90  |
| B8AHC3 | plant    | 97  | B2J0U4 | bacOther | 89  | Q329C6 | bacA     | 86  |
| A1EN07 | bacA     | 85  | A8LBG0 | bacOther | 87  | A8PLM7 | bacOther | 83  |
| Q9UBY9 | animal   | 80  | B7KD55 | bacOther | 89  | C0P152 | fungi    | 139 |
| A1VBJ7 | bacOther | 88  | Q6LS30 | bacA     | 87  | Q0E4A8 | plant    | 90  |
| Q9SSQ8 | plant    | 91  | Q2SQW1 | bacB     | 89  | Q63HY1 | bacB     | 90  |
| A1VBJ8 | bacOther | 85  | Q21GT6 | bacOther | 89  | P02498 | animal   | 83  |
| A4G7K5 | bacOther | 90  | Q21GT5 | bacA     | 85  | Q5P4V2 | bacOther | 88  |
| O82149 | plant    | 90  | B4M9D5 | animal   | 93  | Q5P4V3 | bacOther | 91  |
| B6TLK8 | plant    | 90  | Q2SUS8 | bacOther | 91  | A5VN98 | bacA     | 89  |
| Q5NNU7 | bacA     | 88  | B3MFI6 | animal   | 128 | Q5P4V1 | bacOther | 89  |
| C3MIQ4 | bacA     | 87  | B5AR57 | animal   | 91  | B7P7W0 | animal   | 86  |
| C1F1A2 | bacOther | 89  | Q2IRE4 | bacA     | 88  | B7RR70 | bacOther | 88  |
| Q81DZ3 | bacOther | 92  | B4UW89 | plant    | 90  | B7RR71 | bacOther | 89  |
| Q2W374 | bacB     | 88  | B5XDZ1 | animal   | 87  | B4MN47 | animal   | 97  |
| B6TZJ3 | plant    | 82  | A9R4H1 | bacA     | 86  | B0KF78 | bacA     | 87  |
| P14602 | animal   | 83  | B9R9S7 | plant    | 82  | A3MPF4 | bacOther | 88  |
| Q7U2G3 | bacB     | 97  | C1FHI6 | plant    | 95  | Q0SAR7 | bacOther | 87  |
| A5KQQ8 | bacOther | 91  | C2VBC1 | bacOther | 92  | C4K5P1 | bacOther | 93  |
| A1KF72 | bacB     | 97  | B6TVT8 | plant    | 89  | A0ZLU0 | bacOther | 90  |
| Q5NE64 | bacB     | 87  | A1JT68 | bacA     | 86  | C2TG53 | bacOther | 91  |

|        |          |     |         |          |     |        |          |     |
|--------|----------|-----|---------|----------|-----|--------|----------|-----|
| A5XMJ9 | bacOther | 90  | A3XMR4  | bacOther | 90  | P24623 | animal   | 83  |
| B1JGZ5 | bacA     | 86  | Q12UL4  | archae   | 89  | Q6YFA5 | other    | 94  |
| C0WMS2 | bacOther | 90  | A4ZF52  | plant    | 90  | B2UIT8 | bacOther | 89  |
| C0WMS3 | bacOther | 90  | A4ZF53  | plant    | 92  | B7A9I1 | bacOther | 89  |
| C1HSW2 | bacA     | 86  | A4ZF50  | plant    | 90  | A2S3V1 | bacOther | 88  |
| Q89CQ6 | bacA     | 87  | A4ZF51  | plant    | 90  | Q03XI9 | bacB     | 90  |
| Q5QUR5 | bacA     | 86  | A4ZF55  | plant    | 90  | Q148F8 | animal   | 83  |
| A2XTX1 | plant    | 94  | B4F9K4  | plant    | 89  | Q2S049 | bacB     | 89  |
| B4D446 | bacOther | 87  | B8J4P6  | bacOther | 89  | Q1YZN3 | bacA     | 86  |
| B9EQE2 | animal   | 129 | B3LN77  | fungi    | 95  | Q2HTU2 | plant    | 90  |
| C0UW20 | bacOther | 88  | Q3JTX8  | bacOther | 88  | Q2Y9V1 | bacOther | 90  |
| B7PWF5 | animal   | 89  | C0H177  | bacOther | 89  | Q57I24 | bacA     | 86  |
| Q1K224 | bacOther | 87  | Q87TQ1  | bacA     | 85  | Q57I25 | bacA     | 86  |
| B2VCD6 | bacA     | 104 | Q74B23  | bacOther | 86  | C1C116 | animal   | 90  |
| P11890 | plant    | 82  | B5HNS8  | bacOther | 88  | B6YWY8 | archae   | 89  |
| Q1PVQ3 | bacOther | 88  | C3IJ02  | bacOther | 91  | B9MYM5 | plant    | 79  |
| A9PA59 | plant    | 90  | Q74B24  | bacB     | 89  | B5MT67 | bacOther | 88  |
| Q4JA95 | archae   | 75  | B6GWN9  | fungi    | 90  | O82545 | plant    | 90  |
| A9TYH4 | plant    | 90  | B3NF90  | animal   | 83  | Q93TV7 | bacOther | 87  |
| A6S5D4 | fungi    | 152 | A6BYP2  | bacOther | 89  | A1E386 | animal   | 93  |
| Q72C13 | bacOther | 81  | A9P1V8  | plant    | 90  | Q7PB94 | bacOther | 85  |
| C1BNJ4 | animal   | 92  | A4FCG1  | bacB     | 85  | B7KJ85 | bacOther | 89  |
| Q738V3 | bacOther | 90  | B4IX99  | animal   | 84  | Q67X83 | plant    | 84  |
| Q96331 | plant    | 86  | Q9FGM9  | plant    | 84  | Q26E01 | bacOther | 89  |
| A6CVH4 | bacA     | 86  | C3G2I0  | bacOther | 91  | A1AS89 | bacOther | 87  |
| A8ZW92 | bacB     | 89  | A6BJL5  | bacOther | 91  | Q39820 | plant    | 90  |
| Q1AXA2 | bacOther | 89  | B4HKP4  | animal   | 111 | A1TLP5 | bacOther | 90  |
| Q2B9P4 | bacOther | 87  | A3B9Q4  | plant    | 84  | B3PBC0 | bacOther | 89  |
| O01263 | animal   | 83  | P12810  | plant    | 90  | A8P5M5 | fungi    | 117 |
| Q755Y5 | fungi    | 95  | P12811  | plant    | 91  | Q5ZBP9 | plant    | 86  |
| Q5R9K0 | animal   | 83  | C1XMI6  | bacOther | 88  | A1RY97 | archae   | 88  |
| C0R3E6 | bacOther | 89  | B4HKP2  | animal   | 111 | C1C2G8 | animal   | 84  |
| B4H1L9 | animal   | 98  | Q1ZXL6  | other    | 92  | Q0JQV9 | plant    | 90  |
| B4RI75 | bacOther | 86  | A6X7F8  | bacOther | 88  | A4YJK3 | bacA     | 90  |
| Q663W9 | bacA     | 86  | A7VF65  | bacOther | 90  | C1C2G0 | animal   | 134 |
| A7QEW6 | plant    | 86  | Q8W0Q8  | plant    | 83  | B7LK29 | bacA     | 86  |
| B9QG81 | other    | 89  | B4HKP0  | animal   | 84  | B4G7M3 | animal   | 91  |
| B5EY83 | bacA     | 86  | B0QEP4  | bacOther | 90  | A8FR24 | bacOther | 89  |
| B5IBH1 | archae   | 75  | Q86NK3  | animal   | 93  | B6A1A9 | bacOther | 87  |
| B5EY84 | bacA     | 86  | A2WJ56  | bacB     | 90  | Q24082 | plant    | 91  |
| B5BIJ1 | bacA     | 86  | Q2RVH4  | bacA     | 88  | Q1RI96 | bacOther | 85  |
| B5BIJ2 | bacA     | 86  | C2PEL4  | bacOther | 92  | B9RMP5 | plant    | 104 |
| A1SVR8 | bacOther | 89  | B2BXR1  | plant    | 89  | A8ZNQ6 | bacOther | 89  |
| C1C1T4 | animal   | 84  | Q94EN7  | plant    | 94  | C2NH77 | bacOther | 91  |
| C1ST52 | bacOther | 89  | B8FBB4  | bacOther | 89  | B1QNI1 | bacOther | 88  |
| B7DPN7 | bacOther | 90  | B7L831  | bacA     | 86  | A1S769 | bacA     | 86  |
| B9MYJ0 | plant    | 90  | A5W6Z1  | bacA     | 87  | Q1GJ23 | bacA     | 86  |
| B9BBC0 | bacOther | 88  | Q9UJY1  | animal   | 142 | C6TDB4 | plant    | 88  |
| A9NZQ5 | plant    | 90  | A6CS43  | bacOther | 91  | A7PII9 | plant    | 90  |
| B5VE37 | fungi    | 95  | Q9KFFJ9 | bacOther | 90  | A0YF63 | bacOther | 90  |
| A5EBR2 | bacA     | 88  | B4KTG1  | animal   | 93  | A7PII4 | plant    | 90  |
| B3HM84 | bacA     | 86  | Q8DKI6  | bacOther | 89  | B9M4N9 | bacOther | 89  |
| B3HM83 | bacA     | 86  | Q9ZSY1  | plant    | 90  | A8LJM2 | bacA     | 86  |
| A3NTS4 | bacOther | 90  | Q16JF8  | animal   | 83  | A9WHJ3 | bacOther | 89  |
| B4YNR8 | animal   | 91  | B1EZ36  | bacOther | 90  | P27880 | plant    | 90  |
| B5GE85 | bacB     | 89  | Q16JF6  | animal   | 82  | A7PII3 | plant    | 90  |
| Q6I8P6 | animal   | 110 | Q16JF7  | animal   | 81  | A3W5C4 | bacA     | 86  |
| A3NTS3 | bacOther | 88  | Q16JF4  | animal   | 83  | C2AYG7 | bacA     | 86  |
| C1EIT3 | plant    | 129 | Q16JF5  | animal   | 83  | A6Y8N1 | fungi    | 152 |
| P68283 | animal   | 83  | A7X617  | bacOther | 86  | A9E341 | bacOther | 94  |
| P68280 | animal   | 83  | A3KB94  | bacA     | 86  | C2AYG8 | bacA     | 86  |
| P68281 | animal   | 83  | C1NG08  | bacA     | 86  | C3P8Y0 | bacOther | 90  |
| B4F9E8 | plant    | 99  | Q9SBB7  | plant    | 95  | Q0IIT6 | animal   | 83  |
| P68287 | animal   | 83  | Q9SBB6  | plant    | 92  | B4AAN2 | bacOther | 88  |
| Q092T6 | bacOther | 88  | A5ZU36  | bacOther | 92  | Q5ZSM4 | bacOther | 89  |
| P68285 | animal   | 83  | A5ZU37  | bacOther | 91  | Q8F5V3 | bacOther | 89  |
| P68288 | animal   | 83  | B9J8B9  | bacA     | 92  | B0RGR9 | bacOther | 88  |
| P68289 | animal   | 83  | Q8L5F2  | plant    | 90  | C3E349 | bacOther | 92  |
| Q025J8 | bacOther | 89  | A0LUY6  | bacOther | 87  | A1ZSC4 | bacOther | 90  |
| B6SIH3 | plant    | 90  | B5MGV9  | bacA     | 86  | A2XEW6 | plant    | 90  |
| C0QIF1 | bacB     | 89  | Q8L5F1  | plant    | 90  | P29830 | plant    | 91  |
| A6W261 | bacA     | 85  | B9JA82  | bacA     | 87  | B0CCG0 | bacOther | 89  |
| C6ZDD3 | plant    | 90  | B4QN51  | animal   | 111 | B0GBE6 | bacA     | 86  |
| Q05832 | plant    | 90  | Q494B4  | bacA     | 87  | A2XEW1 | plant    | 90  |
| A4ZF58 | plant    | 90  | A5G5D8  | bacOther | 73  | B8HMB6 | bacOther | 89  |
| C0PD31 | plant    | 89  | P24622  | animal   | 83  | B1G0A8 | bacOther | 91  |

|        |          |     |        |          |     |        |          |     |
|--------|----------|-----|--------|----------|-----|--------|----------|-----|
| A4TGM7 | bacA     | 86  | A4SFB0 | bacOther | 89  | C6T5U3 | plant    | 90  |
| C3KRL9 | bacA     | 85  | B4WHN6 | bacOther | 89  | A9RTI7 | plant    | 90  |
| C3KRL8 | bacB     | 87  | A9P0F0 | plant    | 90  | B8FBC5 | bacOther | 89  |
| Q8MPA7 | other    | 149 | O49710 | plant    | 82  | B4L113 | animal   | 84  |
| B2KWT1 | bacB     | 88  | A4BPT7 | bacOther | 93  | B4L110 | animal   | 114 |
| B2KWT3 | bacB     | 88  | B8FRI1 | bacOther | 90  | B4L111 | animal   | 95  |
| C4K303 | bacOther | 84  | B9MYI7 | plant    | 90  | B4L117 | animal   | 115 |
| Q4PM52 | animal   | 86  | B5RSD8 | bacOther | 90  | B4L114 | animal   | 84  |
| A9AZ38 | bacB     | 89  | B9MYI9 | plant    | 90  | B4L115 | animal   | 93  |
| C4K304 | bacOther | 89  | Q6AUW3 | plant    | 96  | Q5JEA0 | archae   | 89  |
| B8ADT8 | plant    | 90  | B2FH46 | plant    | 90  | Q5LC21 | bacOther | 92  |
| B2IT32 | bacOther | 89  | Q9QZ58 | animal   | 88  | A3EJP4 | bacA     | 85  |
| P02488 | animal   | 83  | A4KP67 | bacOther | 87  | C6T2F2 | plant    | 90  |
| P02489 | animal   | 83  | P04794 | plant    | 90  | A8SVW7 | bacOther | 91  |
| C1XGC3 | bacOther | 89  | P04795 | plant    | 90  | A9LB72 | bacB     | 91  |
| P02484 | animal   | 83  | P04792 | animal   | 83  | Q29F94 | animal   | 84  |
| P02485 | animal   | 83  | P04793 | plant    | 90  | Q16JG4 | animal   | 87  |
| A5C2G0 | plant    | 90  | B6GW11 | fungi    | 108 | Q16JG6 | animal   | 83  |
| P02487 | animal   | 83  | A4TGM6 | bacA     | 86  | C1DIS6 | bacOther | 89  |
| P02480 | animal   | 83  | A1B869 | bacA     | 86  | Q9SYV0 | plant    | 90  |
| Q8H1A6 | plant    | 90  | Q9A637 | bacA     | 86  | C2N0E2 | bacOther | 90  |
| P02482 | animal   | 83  | Q5UZX3 | archae   | 73  | Q16JG2 | animal   | 83  |
| P02483 | animal   | 83  | Q4EBI7 | bacOther | 89  | C1AJS7 | bacB     | 97  |
| B7RR69 | bacOther | 89  | B6KJY0 | other    | 95  | A8RT75 | bacOther | 91  |
| Q1B3Q0 | bacOther | 88  | A4ZF49 | plant    | 90  | Q3ZXT1 | bacOther | 89  |
| B1FN01 | bacOther | 88  | A4ZF48 | plant    | 90  | Q8Z6C0 | bacOther | 88  |
| A9A7A1 | archae   | 90  | A9BGK4 | bacOther | 89  | A7EQW7 | fungi    | 98  |
| B1FN02 | bacOther | 91  | Q9SXP6 | plant    | 92  | C2ADR7 | bacB     | 88  |
| B9AEL1 | archae   | 92  | A7FS82 | bacOther | 88  | A5TYX7 | bacB     | 97  |
| B3PBM9 | bacA     | 86  | Q3B576 | bacOther | 89  | B6T3F5 | plant    | 91  |
| A4JSJ7 | bacOther | 90  | A4ZF47 | plant    | 90  | B4V0C4 | bacOther | 89  |
| A4TXH9 | bacA     | 86  | A4ZF46 | plant    | 90  | A5B868 | plant    | 91  |
| Q9M566 | plant    | 82  | B2FH44 | plant    | 90  | Q2JBP6 | bacOther | 87  |
| A5W385 | bacOther | 89  | Q6HJA2 | bacOther | 90  | B5DFG4 | animal   | 80  |
| C1WN05 | bacOther | 89  | B1KS63 | bacOther | 88  | B9PTP1 | other    | 94  |
| A9SN99 | plant    | 86  | B2FH47 | plant    | 86  | C2BTV7 | bacB     | 88  |
| A3GYE4 | bacA     | 85  | B2FH40 | plant    | 90  | A5ETY9 | bacOther | 89  |
| O44112 | animal   | 83  | B2FH41 | plant    | 90  | B4PEY1 | animal   | 111 |
| Q9GN07 | animal   | 83  | B2FH42 | plant    | 90  | Q0B1P0 | bacOther | 88  |
| Q1V0T5 | bacA     | 90  | B2FH43 | plant    | 90  | Q8H288 | plant    | 90  |
| Q9DEV0 | animal   | 83  | Q24UE1 | bacOther | 90  | B4PEY6 | animal   | 85  |
| C2TG65 | bacOther | 90  | B2FH48 | plant    | 84  | B6J9S8 | bacA     | 85  |
| A9HHR8 | bacA     | 86  | A3C534 | plant    | 83  | B6J9S9 | bacOther | 87  |
| B0AQP0 | bacOther | 90  | B8I9W4 | bacOther | 87  | Q8TK35 | archae   | 89  |
| Q1AY83 | bacB     | 90  | C0B0U8 | bacOther | 88  | Q3I0N4 | plant    | 89  |
| B3AGV6 | bacA     | 86  | A4BPT8 | bacOther | 88  | A2XK84 | plant    | 94  |
| C0PP83 | plant    | 94  | A8PPU2 | bacB     | 89  | B9Q4L3 | other    | 95  |
| B0LSK7 | bacOther | 90  | B8H6W2 | bacOther | 92  | B4PEY4 | animal   | 92  |
| A4VKE5 | bacA     | 87  | A9NQ17 | plant    | 82  | Q7UF81 | bacB     | 88  |
| A7PIG0 | plant    | 90  | Q9C4M2 | archae   | 89  | Q7UF80 | bacOther | 87  |
| B6C1P5 | bacOther | 89  | B9L6U2 | bacOther | 89  | B6UGR5 | plant    | 90  |
| B5YX92 | bacA     | 86  | Q67NK6 | bacOther | 89  | Q64T04 | bacOther | 92  |
| C2QSL5 | bacOther | 90  | B9KS02 | bacA     | 86  | A5XUZ4 | bacB     | 91  |
| C1PF38 | bacOther | 91  | B4PEY2 | animal   | 83  | A5XUZ3 | bacOther | 88  |
| B7WXD8 | bacOther | 89  | B4PEY3 | animal   | 84  | B0DCP8 | fungi    | 91  |
| Q92SI1 | bacA     | 92  | B4PEY0 | animal   | 99  | B0GTY1 | bacA     | 86  |
| B9HC69 | plant    | 90  | A4VAK4 | animal   | 83  | B0DCP5 | fungi    | 91  |
| B4X494 | bacOther | 89  | Q40852 | plant    | 91  | A7PJN6 | plant    | 96  |
| A7KCX9 | animal   | 90  | A3UZ86 | bacA     | 85  | B9SWN0 | plant    | 90  |
| C3X9M1 | bacOther | 88  | O22531 | plant    | 90  | A7I106 | bacOther | 89  |
| A5BUU6 | plant    | 94  | Q40851 | plant    | 92  | B0DCP0 | fungi    | 91  |
| C0UV66 | bacOther | 88  | B4KWV8 | animal   | 83  | A7N1D5 | bacA     | 85  |
| Q7WSY3 | bacOther | 88  | C3X793 | bacOther | 89  | A3DBE9 | bacOther | 89  |
| Q6NBD9 | bacA     | 87  | P12809 | bacOther | 87  | C6T3R3 | plant    | 79  |
| Q5FRB5 | bacA     | 87  | B7LK28 | bacA     | 86  | B0WT02 | animal   | 92  |
| B0SZR1 | bacB     | 89  | B3EKT8 | bacOther | 89  | C3KK66 | animal   | 131 |
| Q1Q6Q3 | bacOther | 89  | B0G2I4 | bacOther | 92  | A4W4S3 | bacA     | 86  |
| Q1Q6Q1 | bacOther | 88  | B5J1Z3 | bacA     | 86  | C1XQ89 | bacOther | 86  |
| A3SV12 | bacA     | 86  | B0QEQ3 | bacOther | 91  | A3CVM3 | archae   | 87  |
| B0HJY4 | bacA     | 86  | Q1PWX2 | bacOther | 89  | A8GVP1 | bacOther | 85  |
| A8S842 | bacOther | 90  | A9AEN8 | bacOther | 85  | A5FVK1 | bacA     | 86  |
| Q1IH85 | bacOther | 89  | C0C061 | bacOther | 91  | B6J7I9 | bacB     | 89  |
| Q86KF5 | other    | 149 | A9RIP2 | plant    | 94  | B9Q9C5 | other    | 95  |
| C2RML2 | bacOther | 90  | C1BTX6 | animal   | 83  | A6X7W3 | bacA     | 85  |
| Q9ZSY0 | plant    | 90  | Q7A3U9 | bacOther | 86  | A6X7W2 | bacOther | 87  |
| B6K761 | fungi    | 89  | B9GJP5 | plant    | 90  | A4T718 | bacB     | 88  |

|        |          |     |        |          |     |        |          |     |
|--------|----------|-----|--------|----------|-----|--------|----------|-----|
| Q0JQW1 | plant    | 90  | P35385 | animal   | 80  | C3XAY2 | bacOther | 90  |
| Q0JQW0 | plant    | 90  | Q6NDQ1 | bacA     | 90  | Q0YQR3 | bacB     | 89  |
| A8S8U2 | bacOther | 65  | Q88HP1 | bacOther | 89  | A1TEW5 | bacOther | 88  |
| B0RYE2 | bacOther | 89  | C3CIC7 | bacOther | 91  | A9F4X2 | bacA     | 86  |
| B4HWF8 | animal   | 91  | C0PCL7 | plant    | 80  | B4WEI9 | bacA     | 89  |
| B2V9Z8 | bacOther | 89  | B8K8Q2 | bacA     | 85  | Q1D8N2 | bacOther | 73  |
| Q39SC0 | bacOther | 89  | P02474 | animal   | 83  | A8PJ71 | animal   | 132 |
| B5CA46 | bacA     | 86  | P02476 | animal   | 83  | A0LKU4 | bacOther | 87  |
| P97541 | animal   | 83  | Q9AMN8 | bacA     | 87  | A8WCV1 | plant    | 90  |
| Q1QXM5 | bacB     | 89  | A3GL01 | bacA     | 85  | A8WCV0 | plant    | 90  |
| B8HF31 | bacOther | 88  | P02472 | animal   | 83  | A8WCV3 | plant    | 90  |
| Q8MJ36 | animal   | 142 | Q6FVM1 | fungi    | 93  | A8WCV2 | plant    | 90  |
| B6BG55 | bacOther | 91  | P02479 | animal   | 83  | A8WCV5 | plant    | 90  |
| C1UBM4 | bacOther | 91  | C0ZG78 | bacOther | 88  | A8WCV4 | plant    | 86  |
| Q550E9 | other    | 156 | Q629T3 | bacB     | 90  | A0K0K3 | bacOther | 88  |
| B9HQU3 | plant    | 90  | B9GUS2 | plant    | 93  | B2FH53 | plant    | 89  |
| Q1QF72 | bacOther | 86  | B2IBF6 | bacA     | 90  | B2FH52 | plant    | 87  |
| A0LSH2 | bacB     | 88  | P42929 | animal   | 83  | B0JSS2 | bacOther | 84  |
| Q8PBS2 | bacOther | 89  | A2BM79 | archae   | 73  | B2FH50 | plant    | 85  |
| A4U847 | animal   | 83  | Q738W4 | bacOther | 91  | B2FH57 | plant    | 89  |
| P30236 | plant    | 90  | B4X4U5 | bacA     | 87  | B2FH56 | plant    | 89  |
| Q162V2 | bacA     | 86  | B4T3T8 | bacOther | 88  | B2FH55 | plant    | 89  |
| Q0YPZ2 | bacOther | 89  | B4L112 | animal   | 90  | B2FH54 | plant    | 77  |
| A7PIH7 | plant    | 90  | C4FCZ7 | bacOther | 91  | Q16JG1 | animal   | 83  |
| Q23951 | animal   | 132 | B2PHX8 | bacA     | 86  | B2FH59 | plant    | 100 |
| A6N9U9 | animal   | 83  | C1PB33 | bacB     | 90  | C6TM72 | plant    | 88  |
| Q6P3C8 | animal   | 83  | Q7D321 | bacA     | 85  | P31170 | plant    | 85  |
| Q2CB60 | bacA     | 86  | A9IVE6 | bacA     | 88  | A4G7H8 | bacOther | 90  |
| Q29Q59 | plant    | 90  | Q9ZVC6 | plant    | 79  | Q73TL7 | bacB     | 90  |
| A6C3F7 | bacOther | 88  | B8A1I4 | plant    | 92  | Q16JG3 | animal   | 83  |
| Q6F862 | bacA     | 88  | Q98GS9 | bacA     | 90  | B6C2B6 | bacOther | 89  |
| Q9EPX0 | animal   | 142 | P57640 | bacOther | 88  | A4S909 | plant    | 93  |
| B6TVC4 | plant    | 81  | C0ZSY0 | bacOther | 88  | Q74B03 | bacOther | 90  |
| B7PIN1 | animal   | 83  | Q9VL41 | animal   | 91  | A3FPF6 | plant    | 87  |
| B8DIS7 | bacOther | 123 | A2BHS1 | animal   | 95  | Q40847 | plant    | 82  |
| C6TNH7 | plant    | 95  | B1C5G9 | bacOther | 91  | Q01544 | plant    | 91  |
| Q8QFU5 | animal   | 83  | B9I8F5 | plant    | 90  | Q24R86 | bacOther | 88  |
| A4JD75 | bacOther | 88  | B2NKC7 | bacA     | 86  | Q5MCR6 | plant    | 90  |
| Q1E6R4 | fungi    | 107 | B4RI58 | bacOther | 87  | A2Y842 | plant    | 80  |
| B8FM33 | bacOther | 89  | Q2NBM1 | bacOther | 87  | A3ESL3 | bacOther | 88  |
| A8CNQ3 | bacOther | 89  | Q7EZ56 | plant    | 79  | C1TDY3 | bacOther | 76  |
| A8KUB4 | bacB     | 91  | Q7EZ57 | plant    | 86  | Q6ZWL5 | plant    | 85  |
| Q6CYV3 | bacA     | 86  | C0YW51 | bacOther | 90  | A0RYP0 | archae   | 73  |
| B0M9N7 | bacOther | 91  | B8HUD8 | bacOther | 89  | B5UU81 | bacOther | 92  |
| Q8YW07 | bacOther | 89  | B4RI50 | bacA     | 86  | C4DBR8 | bacOther | 89  |
| C3AL76 | bacOther | 92  | A5C1L3 | plant    | 90  | A3QEV2 | bacA     | 86  |
| A8HT80 | bacA     | 88  | A7C679 | bacOther | 89  | C0UVF9 | bacOther | 88  |
| C0YDJ9 | bacOther | 90  | B9HC70 | plant    | 90  | B3Q6N4 | bacOther | 87  |
| Q891B1 | bacOther | 88  | C6K8Q9 | other    | 93  | B2K7E5 | bacA     | 86  |
| B6TMR8 | plant    | 86  | B9M1W9 | bacOther | 89  | Q5HDG8 | bacOther | 86  |
| A5A8V1 | plant    | 95  | A8Q0M9 | animal   | 83  | C3KLU7 | bacOther | 89  |
| O14368 | fungi    | 91  | C0UV77 | bacOther | 89  | Q2NQ17 | bacOther | 92  |
| A1AKS8 | bacOther | 86  | B6EMG8 | bacA     | 86  | C4FC38 | bacB     | 88  |
| A2I3W3 | animal   | 83  | Q9ZSX9 | plant    | 90  | Q30WR1 | bacOther | 88  |
| C2MKD5 | bacOther | 90  | Q9ZSX8 | plant    | 90  | A4WYL7 | bacOther | 89  |
| B1T781 | bacOther | 88  | B3M6F2 | animal   | 129 | Q92IQ7 | bacOther | 85  |
| B9HTE1 | plant    | 95  | Q93141 | animal   | 83  | Q60A86 | bacOther | 89  |
| A7RMQ6 | animal   | 82  | Q72I75 | bacOther | 89  | A9ILR8 | bacA     | 89  |
| C0YBJ9 | bacOther | 90  | Q72L60 | bacOther | 85  | A3PVI8 | bacB     | 88  |
| C2YA58 | bacOther | 92  | B6SIX0 | plant    | 90  | B1MET7 | bacOther | 87  |
| Q6L128 | archae   | 86  | A9P2I5 | plant    | 90  | B6TGQ2 | plant    | 90  |
| B7RR56 | bacOther | 93  | B9RE65 | plant    | 70  | O81961 | plant    | 86  |
| Q30WR0 | bacOther | 85  | B6U2K9 | plant    | 97  | B5FMC8 | bacA     | 86  |
| Q0RPJ9 | bacOther | 90  | Q03B95 | bacOther | 90  | A7B048 | bacOther | 91  |
| B5RB54 | bacOther | 88  | Q0CS21 | fungi    | 120 | Q1GDN6 | bacA     | 86  |
| Q1PCB4 | animal   | 93  | A4CXA6 | bacOther | 96  | C3PVB6 | bacOther | 96  |
| P02493 | animal   | 83  | C4ZYW3 | bacA     | 86  | Q62FI3 | bacOther | 90  |
| P02492 | animal   | 83  | B1ZAF3 | bacOther | 89  | A3WSU6 | bacA     | 87  |
| B5Q695 | bacA     | 86  | A9RGT5 | plant    | 90  | C3IYY7 | bacOther | 91  |
| B5Y7P2 | bacOther | 89  | C4ZYW4 | bacA     | 86  | Q3JAU4 | bacOther | 89  |
| P02497 | animal   | 83  | Q98DG1 | bacOther | 89  | B7H509 | bacOther | 92  |
| P02494 | animal   | 83  | Q98DG0 | bacOther | 88  | Q2CFL0 | bacA     | 86  |
| Q1PCB6 | animal   | 93  | P46730 | bacOther | 87  | B1FD37 | bacOther | 89  |
| Q3M1B2 | bacOther | 89  | P46731 | bacOther | 87  | Q04CB2 | bacOther | 90  |
| Q3M8K1 | bacOther | 89  | A8DJJ8 | bacOther | 89  | B9DXQ1 | bacOther | 88  |
| C3X318 | bacOther | 91  | B2XVV2 | other    | 95  | C1ZKW4 | bacOther | 85  |



|        |          |     |        |          |     |        |          |     |
|--------|----------|-----|--------|----------|-----|--------|----------|-----|
| C2QBK5 | bacOther | 92  | A7HEY0 | bacOther | 89  | C4I0D6 | bacA     | 86  |
| A9P171 | plant    | 90  | C1GQS6 | fungi    | 131 | Q9RTR5 | bacOther | 84  |
| C1SQ62 | bacOther | 89  | B2TUT6 | bacA     | 86  | Q01J40 | plant    | 94  |
| Q2K4A9 | bacA     | 87  | B2TUT5 | bacA     | 86  | B5AR56 | animal   | 91  |
| A5D0B6 | bacOther | 89  | B3RCY5 | bacOther | 91  | Q46QT5 | bacOther | 88  |
| B8KKM4 | bacA     | 86  | P31673 | plant    | 90  | Q5SI90 | bacOther | 88  |
| B1EIJ8 | bacA     | 86  | B3EA88 | bacB     | 89  | Q0BSE6 | bacA     | 86  |
| B0N202 | bacOther | 91  | B4DL87 | animal   | 83  | Q6ACF4 | bacB     | 88  |
| Q57733 | archae   | 90  | C3LJK5 | bacOther | 90  | Q8ZTS4 | archae   | 75  |
| Q8L5D5 | plant    | 91  | A3SR97 | bacA     | 86  | Q5SI94 | bacOther | 85  |
| Q8L5D6 | plant    | 91  | Q0SYN0 | bacA     | 86  | B0DXV1 | fungi    | 91  |
| Q8L5D7 | plant    | 82  | A0KEA7 | bacA     | 85  | Q2FEB1 | bacOther | 86  |
| B3EA90 | bacOther | 90  | A0KEA5 | bacA     | 85  | Q6R2J2 | animal   | 83  |
| A3YXD6 | bacOther | 94  | B5CTK5 | bacOther | 91  | B7J6T3 | bacOther | 87  |
| B9HZ23 | plant    | 80  | B0U3C8 | bacOther | 89  | B3LBK6 | other    | 91  |
| C3Q513 | bacOther | 93  | B4AZ68 | bacOther | 89  | Q4MTS3 | bacOther | 92  |
| B4X941 | plant    | 90  | Q13ZT9 | bacOther | 88  | C4FKC7 | bacOther | 86  |
| Q3IZ35 | bacA     | 86  | Q60GF8 | animal   | 86  | Q4N318 | other    | 95  |
| C4DD67 | bacOther | 88  | A3NDH8 | bacOther | 88  | C6SXG1 | plant    | 90  |
| B4G250 | plant    | 90  | A3NDH9 | bacB     | 91  | B9IDI9 | plant    | 76  |
| A4RN64 | fungi    | 115 | Q8L7T2 | plant    | 87  | A2RZM8 | bacB     | 90  |
| Q46QT6 | bacOther | 91  | C0YBK0 | bacOther | 88  | C6SWI1 | plant    | 90  |
| B3NPQ4 | animal   | 128 | A3WYD2 | bacB     | 89  | C6SWI2 | plant    | 72  |
| Q7U3R4 | bacOther | 87  | Q21CA2 | bacA     | 90  | B0R313 | archae   | 90  |
| A5BIM9 | plant    | 94  | Q00TK2 | plant    | 93  | A6D7Y5 | bacA     | 85  |
| Q38ZM7 | bacOther | 90  | Q5R1P6 | animal   | 83  | A3SSJ9 | bacA     | 86  |
| Q3LGX1 | animal   | 84  | P30219 | animal   | 104 | B0R2M3 | archae   | 73  |
| A3IYE9 | bacOther | 89  | B9XSI4 | bacOther | 89  | A0KXI1 | bacA     | 86  |
| Q3LGX2 | animal   | 84  | Q5R1P5 | animal   | 90  | A1WIF6 | bacOther | 74  |
| A1RXI1 | archae   | 91  | A8T622 | bacA     | 85  | Q10RJ2 | plant    | 83  |
| A7ATV2 | other    | 95  | O14558 | animal   | 83  | C3A5F3 | bacOther | 93  |
| A1B6T2 | bacA     | 85  | B6ZQM6 | bacA     | 86  | B7MGA8 | bacA     | 86  |
| A1B6T3 | bacOther | 87  | A5TM99 | bacOther | 90  | Q53595 | bacOther | 89  |
| Q1QP62 | bacA     | 89  | A7HUK2 | bacA     | 85  | A9YME5 | animal   | 94  |
| B4SEH4 | bacOther | 89  | B8FAU4 | bacB     | 89  | Q0B1N9 | bacOther | 89  |
| A8VQC8 | bacB     | 90  | B8NEB7 | fungi    | 111 | Q29NG9 | animal   | 91  |
| A9KAK1 | bacOther | 88  | A9QVI5 | plant    | 90  | B8LQJ4 | plant    | 90  |
| A7QPH7 | plant    | 82  | B5XFE4 | animal   | 86  | B3MPL0 | animal   | 91  |
| A9KAK2 | bacOther | 90  | Q7XE46 | plant    | 83  | Q06823 | bacOther | 89  |
| Q9ZFD1 | bacOther | 89  | Q0RPI6 | bacOther | 87  | B3BDG2 | bacA     | 86  |
| B4S543 | bacB     | 89  | B1JGZ6 | bacA     | 86  | B7N1Z1 | bacA     | 86  |
| O24247 | plant    | 91  | A9TAL4 | plant    | 90  | C1DXW7 | bacOther | 86  |
| B8IH28 | bacOther | 91  | B0UP30 | bacA     | 84  | Q0V0I8 | fungi    | 97  |
| B1TBX9 | bacOther | 91  | Q5WUQ2 | bacA     | 87  | C4IU58 | bacA     | 88  |
| B9MCW3 | bacOther | 90  | A3SA49 | bacA     | 86  | B4IWP6 | animal   | 83  |
| B4U8G1 | bacOther | 89  | A4YRI7 | bacA     | 85  | C0PPG1 | plant    | 97  |
| Q1YFC4 | bacA     | 93  | B6UD04 | plant    | 91  | Q0FEY9 | bacA     | 86  |
| Q74LK4 | bacOther | 90  | Q40056 | plant    | 91  | B4LGT1 | animal   | 84  |
| B8LRE5 | plant    | 86  | Q40057 | plant    | 86  | Q9KVX0 | bacA     | 85  |
| Q1GRE0 | bacA     | 86  | B1QRU0 | bacOther | 88  | B4QMS7 | animal   | 92  |
| B4FES7 | plant    | 85  | Q2SF12 | bacOther | 89  | B9P9K4 | plant    | 90  |
| A6ZL16 | fungi    | 95  | A0NNK7 | bacA     | 86  | C6TC68 | plant    | 80  |
| B0Y0M6 | fungi    | 92  | Q7WMZ1 | bacOther | 87  | A4J0D8 | bacB     | 89  |
| C0FC53 | bacOther | 91  | Q65HW1 | bacOther | 90  | B5VG66 | fungi    | 93  |
| Q11C44 | bacA     | 88  | B8ANK2 | plant    | 81  | B5YIQ1 | bacB     | 89  |
| B8H6B0 | bacA     | 90  | C4LVW9 | other    | 84  | Q2B3Z2 | bacOther | 91  |
| A7IGY3 | bacA     | 90  | Q6L4S2 | plant    | 80  | A9NNU0 | plant    | 82  |
| C2YJI7 | bacOther | 90  | C0CJM8 | bacB     | 90  | Q09648 | animal   | 83  |
| C0XJ10 | bacOther | 90  | P34696 | animal   | 82  | B7YDF0 | bacOther | 88  |
| C0XJ11 | bacOther | 90  | C4KKC9 | archae   | 75  | B4QMS8 | animal   | 84  |
| Q6DQI8 | other    | 89  | C2EAL7 | bacOther | 90  | A9NS53 | plant    | 91  |
| A6POV3 | bacOther | 90  | Q19228 | animal   | 82  | A9T060 | plant    | 90  |
| A7UDX2 | animal   | 93  | B5RRP9 | bacOther | 89  | Q64CD5 | archae   | 89  |
| B4HIV7 | animal   | 83  | A6FPL4 | bacB     | 96  | B5X9K7 | animal   | 87  |
| A8WJJ4 | animal   | 83  | O67316 | bacOther | 89  | B9GIX7 | plant    | 94  |
| B1IGL6 | bacOther | 88  | C0FPB4 | bacOther | 92  | A8NZ97 | animal   | 83  |
| C1C2K8 | animal   | 84  | Q8PXG3 | archae   | 73  | B4J4G2 | animal   | 93  |
| Q5PR64 | animal   | 83  | A5AND9 | plant    | 90  | A6R3A3 | fungi    | 139 |
| Q0B1P1 | bacOther | 91  | C4FKB7 | bacOther | 89  | B4HAQ0 | animal   | 125 |
| Q1Q6Q2 | bacOther | 88  | C2K3X8 | bacOther | 86  | Q1AMF4 | animal   | 104 |
| A3WSG7 | bacA     | 90  | B5PK58 | bacOther | 88  | A5GWM8 | bacOther | 89  |
| B9I303 | plant    | 79  | A7PIE2 | plant    | 90  | Q0DY72 | plant    | 97  |
| Q5X234 | bacOther | 89  | C1SKB1 | bacOther | 89  | C3JPP0 | bacOther | 88  |
| P30221 | plant    | 90  | Q0AZD7 | bacOther | 88  | Q8ZPY6 | bacOther | 88  |
| Q7MRJ3 | bacOther | 89  | A3FMM9 | animal   | 83  | A3EUL0 | bacOther | 90  |
| P30222 | plant    | 86  | A9NMS0 | plant    | 92  | B5XDG3 | animal   | 87  |

|        |          |     |        |          |     |        |          |     |
|--------|----------|-----|--------|----------|-----|--------|----------|-----|
| B9GH40 | plant    | 89  | B9EQI5 | animal   | 101 | B6EXX3 | plant    | 90  |
| A3LD86 | bacA     | 87  | B6ARI9 | bacOther | 88  | A8XKR5 | animal   | 133 |
| Q2PPK1 | animal   | 83  | B2K7E6 | bacA     | 86  | C6T4P8 | plant    | 79  |
| Q8THE3 | archae   | 73  | B1ZWT7 | bacOther | 83  | A8N559 | fungi    | 91  |
| B7EZJ7 | plant    | 90  | B2GDH3 | bacOther | 90  | A0LM85 | bacOther | 89  |
| A1VJV2 | bacOther | 88  | P96193 | bacA     | 87  | C2FPH9 | bacOther | 90  |
| A1VJV3 | bacOther | 85  | P13853 | plant    | 90  | Q5R1P4 | animal   | 83  |
| B9ZDK4 | archae   | 92  | C2AJ40 | bacOther | 88  | B2G3H0 | bacOther | 88  |
| A9GVB2 | bacOther | 84  | Q1GRD9 | bacB     | 87  | C1XFC0 | bacOther | 85  |
| A9GVB5 | bacOther | 88  | Q329C7 | bacA     | 86  | Q8MPA5 | other    | 155 |
| B1GII5 | bacOther | 91  | B4RI37 | bacOther | 89  | C0LAM0 | fungi    | 91  |
| B9Y451 | bacOther | 91  | Q5Z1K6 | bacOther | 88  | A8ZX67 | bacOther | 89  |
| B3GS75 | plant    | 90  | C3X796 | bacOther | 87  | A8ZX66 | bacOther | 88  |
| B9Y452 | bacOther | 91  | Q86G69 | animal   | 84  | C2HBE5 | bacB     | 89  |
| B3A2D6 | bacA     | 86  | A5AG87 | plant    | 90  | Q40510 | plant    | 90  |
| B4I8R4 | animal   | 93  | C6SYL5 | plant    | 91  | A4AVG1 | bacOther | 89  |
| B3A2D5 | bacA     | 86  | Q13ZX1 | bacOther | 88  | A9FXE9 | bacA     | 86  |
| B6H9F1 | fungi    | 97  | B6INQ2 | bacA     | 86  | A6QY49 | fungi    | 101 |
| Q6MPD8 | bacOther | 89  | C0BD51 | bacOther | 92  | C6SVX0 | plant    | 90  |
| A4ESM0 | bacA     | 86  | P29778 | animal   | 85  | B4P9R1 | animal   | 128 |
| B9XGQ1 | bacOther | 89  | A2ZQ23 | plant    | 78  | C1N5X6 | plant    | 126 |
| B2IWQ0 | bacOther | 89  | P09886 | plant    | 86  | A9CX83 | bacA     | 92  |
| Q8G6R2 | bacOther | 107 | B5PBK2 | bacA     | 86  | B4LGT0 | animal   | 84  |
| Q9X9N3 | bacOther | 90  | A5N431 | bacOther | 88  | A6BE80 | bacOther | 91  |
| C1H3L3 | fungi    | 100 | B5PBK1 | bacA     | 86  | B6IZV4 | bacB     | 89  |
| A7V2Z3 | bacOther | 97  | B5QDT2 | bacOther | 88  | B4LGT4 | animal   | 90  |
| A1HQE7 | bacOther | 88  | B4IYH1 | animal   | 115 | A5JV84 | animal   | 83  |
| Q6GL34 | animal   | 95  | A8WY16 | animal   | 82  | Q97AM1 | archae   | 84  |
| C1PT25 | bacOther | 90  | A3V5H2 | bacA     | 86  | A5U456 | bacB     | 88  |
| B2N6C4 | bacA     | 86  | A8WY17 | animal   | 82  | B3PZW3 | bacA     | 87  |
| A7HIY1 | bacB     | 89  | C1K660 | animal   | 83  | B4EVJ7 | bacOther | 88  |
| Q87C16 | bacOther | 89  | A5ULJ7 | archae   | 92  | B1TBX8 | bacOther | 88  |
| B4D447 | bacOther | 89  | P30218 | animal   | 106 | C1QD83 | bacOther | 88  |
| B7H519 | bacOther | 90  | C3NCK1 | archae   | 87  | B6Y8Z4 | bacOther | 89  |
| B1Z4F8 | bacOther | 90  | A8YDU2 | bacOther | 89  | Q46E59 | archae   | 89  |
| C2UDC0 | bacOther | 92  | B6AKR0 | bacOther | 90  | B6H5V7 | fungi    | 144 |
| Q5PKS6 | bacA     | 86  | A5A8V0 | plant    | 92  | A3V9Z9 | bacA     | 86  |
| Q5PKS5 | bacA     | 86  | A5A8V3 | plant    | 92  | Q8L8S1 | plant    | 90  |
| A2S5H0 | bacB     | 91  | A5A8V2 | plant    | 92  | Q6G6T4 | bacOther | 86  |
| Q20165 | animal   | 83  | C3VMY8 | animal   | 83  | B1WVB7 | bacOther | 89  |
| B0R9P1 | archae   | 79  | A5A8V4 | plant    | 92  | C2NYA5 | bacOther | 92  |
| B4UY27 | bacOther | 89  | A4BE31 | bacA     | 86  | B3ZUN3 | bacOther | 91  |
| Q4C3P7 | bacOther | 89  | A6Q779 | bacOther | 89  | B5PR02 | bacA     | 86  |
| A2XCQ1 | plant    | 86  | B6G7P4 | bacOther | 88  | B4TMX7 | bacA     | 86  |
| C3J7G8 | bacOther | 90  | B8LM88 | plant    | 85  | Q033V8 | bacOther | 90  |
| B4IYY3 | animal   | 97  | Q4UJB0 | bacOther | 85  | B3NVQ2 | animal   | 124 |
| A6F829 | bacA     | 89  | Q4UJB1 | bacOther | 89  | A3U7U0 | bacOther | 91  |
| A6F828 | bacA     | 86  | A9NFB2 | bacOther | 90  | Q14FL7 | bacB     | 87  |
| B3EA89 | bacOther | 86  | Q552K9 | other    | 146 | B3MQA4 | animal   | 125 |
| C2RMK2 | bacOther | 92  | C1WNQ7 | bacOther | 87  | B1Z7M4 | bacOther | 87  |
| Q0C682 | bacA     | 88  | A1AW82 | bacOther | 87  | B1Z7M3 | bacA     | 86  |
| Q9FHQ3 | plant    | 95  | Q2WG64 | animal   | 83  | Q08275 | plant    | 89  |
| Q6J0T4 | plant    | 90  | A6E6F1 | bacOther | 89  | Q8LCB4 | plant    | 84  |
| C1TPD4 | bacOther | 88  | B9LSA4 | archae   | 125 | P06582 | animal   | 82  |
| C1Y0W3 | bacOther | 88  | C0UNJ7 | bacOther | 88  | A1V2X8 | bacOther | 88  |
| Q2KYH5 | bacOther | 87  | B9IZR3 | bacOther | 90  | A1V2X9 | bacOther | 90  |
| A2EJL4 | other    | 87  | B9LSA3 | archae   | 89  | C4DDZ7 | bacB     | 86  |
| C2VTA7 | bacOther | 90  | A1AKS9 | bacB     | 89  | C4K151 | bacOther | 85  |
| A8XV09 | animal   | 82  | A4ZX74 | plant    | 89  | B3PZA6 | bacA     | 90  |
| B9I224 | plant    | 86  | A7VBU8 | bacOther | 92  | C1BP33 | animal   | 79  |
| A2S3V0 | bacOther | 90  | P30693 | plant    | 90  | Q9ZSZ0 | plant    | 90  |
| B0R6E3 | archae   | 91  | C0Q740 | bacOther | 88  | Q1PXG9 | bacOther | 89  |
| B2UIS6 | bacOther | 90  | Q2YIE9 | bacA     | 88  | Q3AUK8 | bacOther | 89  |
| Q91308 | animal   | 87  | B6A4X2 | bacA     | 85  | B8BN43 | plant    | 83  |
| B8A113 | plant    | 91  | B2V6N1 | bacOther | 86  | B9F2C0 | plant    | 100 |
| Q30ZU1 | bacOther | 81  | B9XRT8 | bacOther | 87  | B9R8U2 | plant    | 82  |
| Q0AFP2 | bacOther | 89  | B9XRT7 | bacOther | 89  | B6T5G0 | plant    | 84  |
| Q1ARJ6 | bacB     | 89  | B3AXF7 | bacA     | 86  | O48898 | plant    | 89  |
| B9L1K2 | bacOther | 87  | Q6Z7V2 | plant    | 84  | A8TI16 | archae   | 90  |
| B5BZ61 | bacOther | 88  | Q57A32 | bacA     | 88  | B6WUU3 | bacOther | 100 |
| Q9ZP84 | plant    | 90  | P0C060 | bacA     | 86  | B4RHY8 | bacOther | 91  |
| A9N391 | bacOther | 88  | C0YR18 | bacOther | 87  | Q8VXJ3 | plant    | 90  |
| C0GND0 | bacOther | 88  | C2FYG4 | bacOther | 89  | Q8VXJ4 | plant    | 90  |
| C0GND1 | bacB     | 85  | B5TGQ8 | animal   | 83  | Q551F8 | other    | 174 |
| A3WC19 | bacA     | 87  | A9QVH3 | plant    | 86  | C3L2B5 | bacOther | 88  |
| A3K904 | bacA     | 86  | Q9M670 | plant    | 80  | C4APC3 | bacOther | 88  |

|        |          |     |        |          |     |        |          |     |
|--------|----------|-----|--------|----------|-----|--------|----------|-----|
| C4APC2 | bacOther | 90  | B9L020 | bacOther | 89  | A7NYP2 | plant    | 90  |
| Q9RVB5 | bacOther | 88  | B1IYQ8 | bacA     | 86  | Q2KAT7 | bacA     | 85  |
| Q63VB9 | bacOther | 90  | B7ZRQ5 | animal   | 83  | Q2KAT6 | bacOther | 87  |
| B9IA42 | plant    | 98  | C1VAD6 | archae   | 79  | B9MJU9 | bacB     | 88  |
| B6QVV3 | fungi    | 131 | Q1NXJ6 | bacOther | 89  | A7RMQ7 | animal   | 97  |
| A5XRW8 | bacOther | 88  | Q81R10 | bacOther | 91  | Q6DG35 | animal   | 83  |
| A5XRW7 | bacOther | 90  | A6CAR4 | bacOther | 86  | B9L2N0 | bacOther | 92  |
| B1M1B4 | bacA     | 86  | A2S5G9 | bacOther | 88  | A9VTY2 | bacOther | 93  |
| B2ZBG8 | plant    | 90  | B5ZQ18 | bacA     | 87  | Q2NX42 | bacA     | 103 |
| Q5T5Q2 | animal   | 80  | A0B7C0 | archae   | 72  | A0LJ27 | bacB     | 89  |
| A3MWN1 | archae   | 88  | Q8PX03 | archae   | 89  | Q2RL87 | bacOther | 91  |
| A3PN62 | bacA     | 86  | A5IK41 | bacOther | 89  | Q7XZ71 | other    | 117 |
| Q2BEX9 | bacOther | 87  | A2X246 | plant    | 90  | A7UZZ9 | bacOther | 92  |
| Q12E92 | bacB     | 91  | B4WSZ5 | bacOther | 89  | A1AHM2 | bacA     | 86  |
| A8WY15 | animal   | 82  | B4S6P8 | bacOther | 89  | B1M1B3 | bacOther | 87  |
| Q8LBH7 | plant    | 90  | Q3A7M6 | bacOther | 86  | B7FK78 | plant    | 79  |
| Q8LD91 | plant    | 96  | C3WB02 | bacOther | 91  | Q3SW62 | bacA     | 90  |
| B0NH96 | bacB     | 91  | Q91311 | animal   | 83  | Q16CG4 | bacA     | 86  |
| B0M1A7 | plant    | 95  | A4WP08 | bacA     | 86  | Q9VWG1 | animal   | 89  |
| B6B8E6 | bacOther | 96  | O64564 | plant    | 72  | A8EIA6 | bacOther | 88  |
| Q83CE9 | bacB     | 89  | Q0W6B5 | archae   | 73  | A8EIA7 | bacB     | 91  |
| A8G7R9 | bacA     | 86  | B8E9E2 | bacA     | 86  | P94898 | bacOther | 90  |
| A4WLE3 | archae   | 75  | Q4WNG3 | fungi    | 139 | P02499 | animal   | 83  |
| A6LM31 | bacOther | 89  | C1APV1 | bacB     | 88  | B0NKH9 | bacOther | 91  |
| Q0BJX2 | bacOther | 87  | C2F1P3 | bacOther | 90  | B7QVQ7 | bacA     | 86  |
| A8RTQ4 | bacOther | 92  | C0GSG2 | bacOther | 89  | Q9V1L0 | archae   | 89  |
| B8I8D2 | bacB     | 88  | B5ERR0 | bacOther | 89  | A4SH53 | bacA     | 85  |
| Q3APD3 | bacOther | 89  | Q084A0 | bacA     | 86  | B3E7K3 | bacOther | 89  |
| Q8G2Z4 | bacA     | 89  | Q9VSA9 | animal   | 83  | A8G7R8 | bacA     | 86  |
| A8RTQ3 | bacOther | 91  | Q3XX56 | bacB     | 89  | C1XQN9 | bacOther | 88  |
| A5J5Y4 | bacOther | 88  | Q6G1G0 | bacA     | 89  | B6QRH6 | fungi    | 157 |
| O69241 | bacA     | 85  | Q752Z6 | fungi    | 95  | A3Q9M0 | bacOther | 89  |
| O69242 | bacA     | 85  | B5NDS5 | bacA     | 86  | B5TGR2 | animal   | 83  |
| O69243 | bacB     | 86  | A9PFJ9 | plant    | 98  | B1KXD4 | bacOther | 88  |
| A9XBI3 | plant    | 90  | A7F5L9 | fungi    | 148 | P0C054 | bacA     | 86  |
| Q8PZK9 | archae   | 89  | C2A5F4 | bacB     | 88  | P0C055 | bacA     | 86  |
| B6U175 | plant    | 99  | Q72EC0 | bacOther | 88  | Q2JL65 | bacOther | 89  |
| A1ATK1 | bacOther | 89  | Q72EC1 | bacOther | 85  | Q28ZF4 | animal   | 128 |
| C6T1Y1 | plant    | 90  | B1HHR6 | bacOther | 88  | B8D8A0 | bacOther | 88  |
| A5FUZ6 | bacB     | 89  | C4RBK2 | bacOther | 88  | A7MPZ0 | bacA     | 86  |
| A7SQF4 | animal   | 97  | Q41815 | plant    | 94  | C3BK20 | bacOther | 92  |
| A7SQF6 | animal   | 83  | Q10FT7 | plant    | 79  | Q1GP87 | bacA     | 88  |
| A6C0C3 | bacOther | 89  | B0HJY3 | bacA     | 86  | A1B453 | bacA     | 86  |
| Q40867 | plant    | 90  | Q9LPG9 | plant    | 90  | C0Y6K2 | bacB     | 91  |
| Q40866 | plant    | 90  | A4YWX0 | bacB     | 89  | Q4WV00 | fungi    | 92  |
| Q40865 | plant    | 90  | B6T1R8 | plant    | 85  | A0LC76 | bacOther | 89  |
| C4RKY5 | bacOther | 87  | C0RGL7 | bacA     | 89  | A7NEZ3 | bacOther | 87  |
| B1FU61 | bacOther | 89  | B5G209 | animal   | 88  | A8N561 | fungi    | 91  |
| B1FU62 | bacOther | 88  | Q5EAC9 | animal   | 142 | C3MKA3 | archae   | 75  |
| B1FU63 | bacB     | 92  | C1YR00 | bacOther | 87  | Q5L3D9 | bacOther | 88  |
| B4H2A3 | animal   | 83  | Q9X9C3 | bacOther | 90  | Q84Q72 | plant    | 90  |
| A4JD76 | bacOther | 91  | Q1N8K9 | bacA     | 105 | Q84Q77 | plant    | 90  |
| B0T680 | bacA     | 89  | Q3ITA4 | archae   | 96  | Q89C37 | bacOther | 89  |
| B1GIH5 | bacOther | 90  | Q6CD63 | fungi    | 93  | B1X9B6 | bacA     | 86  |
| Q8TUD5 | archae   | 89  | B5IM58 | bacOther | 100 | B1X9B7 | bacA     | 86  |
| B1Q6U9 | bacOther | 88  | A6Q780 | bacOther | 90  | A8ZX51 | bacOther | 89  |
| A1BET9 | bacOther | 89  | Q67QW2 | bacOther | 86  | Q2NH97 | archae   | 90  |
| B4EEH1 | bacOther | 90  | A5A8U5 | plant    | 86  | Q0G5S4 | bacA     | 92  |
| C0RK03 | bacA     | 88  | A5A8U6 | plant    | 95  | A9VY78 | bacA     | 86  |
| C4KV48 | bacB     | 91  | A5A8U7 | plant    | 95  | C4C7M6 | bacOther | 89  |
| C0PSL0 | plant    | 86  | A5A8U0 | plant    | 85  | Q943E6 | plant    | 90  |
| Q6RFM0 | plant    | 90  | A5A8U1 | plant    | 85  | Q943E7 | plant    | 90  |
| A9ZZB9 | bacA     | 86  | B3XNA0 | bacOther | 90  | Q943E9 | plant    | 91  |
| A9NK63 | plant    | 91  | A5A8U3 | plant    | 87  | Q03928 | bacOther | 90  |
| Q8ZTN4 | archae   | 75  | B6C4X3 | bacOther | 89  | B9CMA0 | bacOther | 88  |
| B4BRE7 | bacOther | 88  | A5A8U8 | plant    | 95  | Q7WBG9 | bacOther | 87  |
| Q04H04 | bacOther | 90  | A5A8U9 | plant    | 92  | Q2T6S8 | bacOther | 89  |
| C6SV69 | plant    | 92  | B6C4X4 | bacOther | 89  | A2FKF2 | other    | 87  |
| A7HPP8 | bacA     | 88  | Q2WFK9 | plant    | 90  | A3XZZ5 | bacA     | 85  |
| Q109M7 | plant    | 84  | B1X3A5 | bacOther | 89  | Q29IV3 | animal   | 125 |
| A2VJD9 | bacB     | 88  | A9WX80 | bacA     | 88  | B9NMH0 | bacA     | 86  |
| B2AM23 | fungi    | 156 | Q5SKS2 | bacOther | 85  | B6H317 | fungi    | 106 |
| B1EIJ7 | bacA     | 86  | C3I0B9 | bacOther | 90  | C2KTB0 | bacB     | 88  |
| B1IYQ7 | bacA     | 86  | A9TWQ2 | plant    | 90  | Q74MA9 | archae   | 89  |
| Q6DUA8 | other    | 95  | C2CYT7 | bacOther | 90  | P02518 | animal   | 111 |
| A6WCM8 | bacOther | 87  | B8GJM7 | archae   | 92  | P02519 | plant    | 90  |

|        |          |     |        |          |     |        |          |     |
|--------|----------|-----|--------|----------|-----|--------|----------|-----|
| P02516 | animal   | 99  | B0NQA6 | bacOther | 92  | C1PB40 | bacB     | 90  |
| P02517 | animal   | 83  | Q95661 | plant    | 87  | C2G8F2 | bacOther | 86  |
| C2NYB6 | bacOther | 90  | P02478 | animal   | 83  | C1GHG3 | fungi    | 100 |
| P02515 | animal   | 92  | Q4URT0 | bacOther | 89  | Q57Q43 | bacOther | 88  |
| P02512 | animal   | 83  | Q0TB20 | bacA     | 86  | A5AT75 | plant    | 90  |
| P02513 | animal   | 82  | C0Q251 | bacA     | 86  | B7M4H5 | bacA     | 86  |
| P02510 | animal   | 83  | C0Q250 | bacA     | 86  | B7M4H6 | bacA     | 86  |
| P02511 | animal   | 83  | Q9ZPQ0 | plant    | 72  | C2HM07 | bacOther | 90  |
| Q0HVN5 | bacA     | 86  | A0QZ83 | bacB     | 88  | C2W7P3 | bacOther | 92  |
| A1TC18 | bacB     | 88  | B3M6F1 | animal   | 139 | A7QIP4 | plant    | 89  |
| C1ZXT9 | bacOther | 89  | Q30VU1 | bacOther | 89  | C0PLX5 | plant    | 90  |
| A9NU79 | plant    | 91  | A7M0U1 | bacOther | 92  | A4WL81 | archae   | 75  |
| A1V0E1 | bacB     | 91  | B9FK35 | plant    | 96  | B2PHX9 | bacA     | 86  |
| A1V0E0 | bacOther | 88  | Q9LS37 | plant    | 92  | A3UH27 | bacA     | 88  |
| B9JS60 | bacA     | 88  | A7SQF7 | animal   | 97  | C2F8E9 | bacOther | 90  |
| B5QU36 | bacA     | 86  | C6T1V2 | plant    | 90  | Q9LNW0 | plant    | 90  |
| B5QU37 | bacA     | 86  | B0UN18 | bacOther | 89  | B5WIC4 | bacB     | 90  |
| Q18DP6 | archae   | 79  | Q5MCP0 | animal   | 83  | B4EEH0 | bacOther | 88  |
| B0S9H4 | bacOther | 88  | B9MYM7 | plant    | 79  | A6W4Q7 | bacOther | 87  |
| B0S9H5 | bacOther | 89  | A7GPB1 | bacOther | 90  | Q01QQ8 | bacOther | 89  |
| Q46BJ5 | archae   | 89  | P0C057 | bacA     | 86  | B5XDZ3 | animal   | 87  |
| Q220H0 | bacOther | 89  | Q7YWK6 | other    | 95  | P19244 | plant    | 90  |
| Q63BT2 | bacOther | 90  | B2J3W2 | bacOther | 89  | P19242 | plant    | 90  |
| A9XBI2 | plant    | 90  | Q566R8 | animal   | 83  | P19243 | plant    | 90  |
| Q3SND9 | bacA     | 89  | C1TAI7 | bacOther | 89  | Q27SL3 | bacOther | 90  |
| A0PX96 | bacOther | 90  | B9BBB9 | bacOther | 91  | Q43660 | plant    | 88  |
| B9PKA9 | other    | 95  | B5J8W9 | bacA     | 86  | C6THQ1 | plant    | 92  |
| A6MYV3 | bacOther | 85  | Q3A9H1 | bacOther | 90  | Q64DP6 | archae   | 89  |
| A6MYV2 | bacOther | 89  | C1F1Y8 | bacOther | 90  | Q04TQ0 | bacOther | 85  |
| A3MX60 | archae   | 75  | B0GBE7 | bacA     | 86  | Q04TQ1 | bacOther | 87  |
| Q7M2W6 | animal   | 83  | C3D180 | bacOther | 91  | B9E7L3 | bacB     | 90  |
| B9BAG5 | bacOther | 85  | Q2KHU9 | animal   | 88  | A2I490 | animal   | 85  |
| C3QRG3 | bacOther | 92  | B0GTY2 | bacA     | 86  | B5Y4C3 | other    | 95  |
| Q9HZ98 | bacA     | 87  | P19752 | fungi    | 158 | B3ZUP5 | bacOther | 90  |
| B3WW25 | bacA     | 86  | B4L811 | animal   | 125 | A1D5W7 | fungi    | 126 |
| B3WW24 | bacA     | 86  | Q8AAA0 | bacOther | 92  | Q31E11 | bacOther | 89  |
| Q1MMC7 | bacA     | 90  | Q05557 | animal   | 83  | Q7Y0A2 | plant    | 94  |
| A6FSL9 | bacOther | 89  | A5D2M5 | bacOther | 90  | B8GB01 | bacOther | 89  |
| A3HWK2 | bacOther | 89  | C3MTC4 | archae   | 87  | B1L3V3 | archae   | 77  |
| C4J5C1 | plant    | 84  | Q28973 | archae   | 73  | Q8L470 | plant    | 87  |
| Q2IP34 | bacOther | 89  | B6R2H6 | bacA     | 90  | Q2IWA6 | bacOther | 87  |
| A7UNS9 | plant    | 91  | B6SJE9 | plant    | 89  | B5NUL2 | bacA     | 86  |
| B2GWJ2 | bacOther | 90  | Q2SUS7 | bacOther | 88  | B5NUL3 | bacA     | 86  |
| B2GWJ3 | bacOther | 88  | A0RXR5 | archae   | 87  | B7KXM2 | bacB     | 89  |
| C0P8J4 | plant    | 90  | Q0UTQ3 | fungi    | 236 | A5A8T7 | plant    | 89  |
| A3DK41 | bacOther | 88  | C2LWP1 | bacOther | 86  | C1DVH9 | bacOther | 89  |
| A7P4Q3 | plant    | 70  | A5V3X1 | bacA     | 88  | A5A8T4 | plant    | 89  |
| B2IXS3 | bacOther | 89  | P02506 | animal   | 83  | C0PSL4 | plant    | 86  |
| B5EDN0 | bacOther | 86  | Q6DJI2 | animal   | 83  | A5A8T9 | plant    | 85  |
| B7VBP4 | bacA     | 87  | C0G1Y9 | archae   | 89  | A5A8T8 | plant    | 89  |
| P02477 | animal   | 83  | C4ELG3 | bacOther | 88  | A7VJB3 | bacB     | 88  |
| Q8N241 | animal   | 80  | A4IFQ9 | animal   | 83  | A1RRY3 | archae   | 75  |
| B5N0T0 | bacA     | 86  | B5W5D6 | bacOther | 89  | B3M964 | animal   | 83  |
| Q63VC0 | bacOther | 88  | A9AE77 | bacOther | 58  | B9HQH9 | plant    | 79  |
| A6FV78 | bacOther | 86  | B5EKD0 | bacOther | 89  | Q89WG1 | bacA     | 90  |
| P02470 | animal   | 83  | Q546L9 | animal   | 83  | B7GFT1 | bacOther | 87  |
| B6BS30 | bacA     | 90  | B5P7T6 | bacOther | 88  | C3I0A6 | bacOther | 92  |
| B3GK93 | animal   | 106 | P82531 | animal   | 83  | C1YJ13 | bacOther | 88  |
| B9RXN2 | plant    | 62  | P82533 | animal   | 83  | Q9SMF2 | plant    | 90  |
| A1USG7 | bacA     | 88  | Q5V8K5 | fungi    | 91  | Q1C3L0 | bacA     | 86  |
| A3PG77 | bacA     | 86  | Q0BGM3 | bacOther | 91  | B9XRD9 | bacOther | 87  |
| Q9QZ57 | animal   | 90  | A8NJG2 | animal   | 83  | B9XRD8 | bacB     | 89  |
| B5G213 | animal   | 88  | A5AFX4 | plant    | 82  | B9RQT7 | plant    | 90  |
| B4UZC5 | bacOther | 89  | A8YX44 | bacOther | 90  | C6TJG3 | plant    | 80  |
| B3IKH2 | bacA     | 86  | Q0BGM4 | bacOther | 88  | A3IKW0 | bacOther | 89  |
| A8SC82 | bacOther | 90  | A8F352 | bacOther | 89  | A6A4U2 | bacA     | 85  |
| A6N6X0 | animal   | 83  | B9DLB1 | bacOther | 90  | A8PSZ9 | animal   | 83  |
| A3X4W6 | bacA     | 86  | C1BXD1 | animal   | 86  | A6XXH0 | bacA     | 85  |
| Q5E8Y8 | bacA     | 86  | A5I023 | bacOther | 88  | B9RQT8 | plant    | 91  |
| A6BE79 | bacOther | 92  | A7RA96 | bacOther | 89  | B9RQT9 | plant    | 93  |
| B7JMH7 | bacOther | 91  | B7UMF3 | bacA     | 86  | C1G9M7 | fungi    | 131 |
| P68286 | animal   | 83  | A1QZN2 | bacOther | 89  | C3KMZ6 | bacA     | 85  |
| Q8GWH1 | plant    | 91  | C1FNQ3 | bacOther | 88  | Q00445 | plant    | 92  |
| C1D2D1 | bacOther | 88  | B4R8Z7 | bacA     | 86  | Q5XLC5 | other    | 95  |
| A8EY26 | bacOther | 85  | A2Z584 | plant    | 100 | B3YEC8 | bacA     | 86  |
| Q8PNC2 | bacOther | 89  | B2TFQ6 | bacOther | 88  | B2HN40 | bacOther | 93  |

|        |          |     |        |          |     |        |          |     |
|--------|----------|-----|--------|----------|-----|--------|----------|-----|
| B8E2I9 | bacOther | 89  | Q1PCB5 | animal   | 83  | P27397 | plant    | 90  |
| C0P4A5 | plant    | 79  | B1T782 | bacOther | 89  | P27396 | plant    | 90  |
| Q8NJ78 | fungi    | 91  | Q1PCB7 | animal   | 83  | A3AGD3 | plant    | 90  |
| B6VU66 | bacOther | 96  | C0PS07 | plant    | 86  | Q91312 | animal   | 83  |
| Q27354 | other    | 95  | C4K5Z9 | bacOther | 93  | C1VB95 | archae   | 87  |
| B0R6B7 | archae   | 87  | Q1PCB3 | animal   | 83  | A8NPN6 | animal   | 98  |
| B7L830 | bacA     | 86  | A0YEN2 | bacOther | 90  | Q2J2E8 | bacA     | 90  |
| Q1V4W4 | bacA     | 85  | C1V6J5 | archae   | 73  | O49962 | plant    | 90  |
| B7ABU8 | bacOther | 85  | B2FH51 | plant    | 87  | C2G2V2 | bacOther | 87  |
| B7ABU5 | bacOther | 88  | A4SA33 | plant    | 95  | Q43701 | plant    | 90  |
| A0QK17 | bacOther | 87  | B1T780 | bacOther | 91  | C2RXB8 | bacOther | 90  |
| C2IEN7 | bacA     | 85  | C1BSB7 | animal   | 83  | Q970D9 | archae   | 87  |
| B3YEC9 | bacA     | 86  | B6SRC0 | plant    | 85  | B3DNV4 | bacOther | 107 |
| C2NOD2 | bacOther | 92  | A3MGW0 | bacOther | 90  | Q5ENY9 | animal   | 83  |
| A9H2E8 | bacA     | 86  | Q312K2 | bacOther | 85  | Q8LMQ7 | plant    | 86  |
| A4AL66 | bacB     | 88  | C3MF18 | bacA     | 92  | A9LPA2 | animal   | 83  |
| Q41218 | plant    | 92  | B4RCJ8 | bacA     | 88  | B4TTN0 | bacOther | 88  |
| B0C7V1 | bacOther | 89  | A1VFN1 | bacOther | 91  | A1TWP0 | bacOther | 89  |
| B6SZ50 | plant    | 97  | A2V217 | bacA     | 86  | A8NRR9 | fungi    | 119 |
| A5Z8K7 | bacOther | 98  | C2MKC3 | bacOther | 91  | A2X9T6 | plant    | 84  |
| Q18KD0 | archae   | 73  | A2XEH6 | plant    | 92  | B3HA30 | bacA     | 86  |
| Q1HAT5 | animal   | 83  | O18634 | animal   | 83  | B0HTL6 | bacA     | 86  |
| A2QFQ8 | fungi    | 97  | B9GYA4 | plant    | 81  | B0HTL7 | bacA     | 86  |
| Q1MBV5 | bacA     | 87  | P27777 | plant    | 90  | C0GNC9 | bacOther | 89  |
| B8DSE1 | bacOther | 88  | A3CA50 | plant    | 98  | Q7PT53 | animal   | 83  |
| B0SS64 | bacOther | 89  | Q6AM30 | bacOther | 89  | Q7PT52 | animal   | 113 |
| C2HSI2 | bacA     | 85  | P46729 | bacOther | 87  | B5CKF8 | bacOther | 88  |
| Q8ZL03 | bacA     | 86  | Q11EQ2 | bacA     | 87  | A9CPE4 | animal   | 83  |
| B4JME7 | animal   | 125 | B7JMI9 | bacOther | 90  | B0JUE5 | bacOther | 89  |
| A5B2N0 | plant    | 90  | Q3Z7X0 | bacOther | 89  | A8GRF0 | bacOther | 85  |
| A8IXN9 | plant    | 91  | Q0UWH5 | fungi    | 139 | A5VL40 | bacOther | 90  |
| A9FA72 | bacOther | 89  | A9ADY4 | bacOther | 89  | B3NCE9 | animal   | 83  |
| Q2NBM0 | bacA     | 87  | C1BPD5 | animal   | 84  | A9DJ70 | bacA     | 86  |
| A2W504 | bacB     | 92  | B6DZ38 | animal   | 83  | Q2KD97 | bacA     | 90  |
| A2W503 | bacOther | 88  | A9NX13 | plant    | 92  | A7QKW7 | plant    | 90  |
| Q13ER7 | bacA     | 90  | Q15PV4 | bacOther | 90  | A1AHM1 | bacA     | 86  |
| B4NBT3 | animal   | 126 | Q9ZP24 | plant    | 87  | Q890A7 | bacOther | 90  |
| A2R5S8 | fungi    | 90  | Q16S79 | animal   | 83  | A7ABY8 | bacOther | 92  |
| A3IXT1 | bacOther | 89  | C2ZP48 | bacOther | 92  | B3NCE7 | animal   | 92  |
| Q1NI79 | bacB     | 89  | A9NS87 | plant    | 90  | A9CFS9 | bacA     | 88  |
| P02509 | animal   | 83  | B4MAS6 | animal   | 125 | B7PWF4 | animal   | 78  |
| B2TGK1 | bacOther | 89  | B3WMM1 | bacA     | 86  | B6I3R9 | bacA     | 86  |
| Q7RS01 | other    | 86  | B3WMM2 | bacA     | 86  | Q19AL9 | fungi    | 131 |
| P02505 | animal   | 83  | A3VTU6 | bacA     | 87  | B3CLF4 | bacOther | 89  |
| P02504 | animal   | 83  | Q1R4P9 | bacA     | 86  | Q2JPN1 | bacOther | 88  |
| A5FBJ9 | bacOther | 90  | C8CBN4 | animal   | 105 | Q7S0S7 | fungi    | 138 |
| P02501 | animal   | 83  | A9NMF4 | plant    | 96  | B9IN54 | plant    | 72  |
| P02503 | animal   | 83  | A7GPA2 | bacOther | 92  | C6TDW8 | plant    | 77  |
| P02502 | animal   | 83  | B1FD39 | bacOther | 91  | A5UUL5 | bacOther | 88  |
| B2UG24 | bacOther | 91  | P0C059 | bacA     | 86  | Q6HJB3 | bacOther | 91  |
| B2UG25 | bacOther | 88  | A2RBG6 | fungi    | 137 | B8ZS71 | bacOther | 87  |
| Q5V1J3 | archae   | 87  | Q9SYG1 | plant    | 95  | A2Z7R5 | plant    | 83  |
| Q1BXG4 | bacOther | 88  | A5JZ38 | other    | 91  | Q9SYU9 | plant    | 90  |
| Q1BXG3 | bacOther | 91  | B8CPJ4 | bacA     | 86  | Q9SYU8 | plant    | 90  |
| A6U4B5 | bacOther | 86  | Q9RNV9 | bacB     | 90  | C0GCW4 | bacOther | 89  |
| Q69BI7 | plant    | 90  | B4IYY1 | animal   | 118 | B2ZES2 | plant    | 90  |
| A3V7F6 | bacA     | 86  | B4IYY0 | animal   | 93  | Q4FP87 | bacA     | 90  |
| A6Q5H5 | bacOther | 89  | P19037 | plant    | 90  | A6M0V3 | bacOther | 88  |
| Q6EMB9 | plant    | 87  | P19036 | plant    | 90  | Q8S1F2 | plant    | 74  |
| A9NTL9 | plant    | 91  | A0M3R4 | bacOther | 91  | Q0ABW2 | bacOther | 89  |
| Q63BU3 | bacOther | 91  | B9IQG7 | plant    | 90  | C4ILE7 | bacOther | 88  |
| B5G211 | animal   | 88  | Q07UJ0 | bacA     | 90  | O74984 | fungi    | 90  |
| A9NMH9 | plant    | 86  | B6T339 | plant    | 90  | O35878 | animal   | 83  |
| Q0KBR2 | bacOther | 88  | C0SEB0 | fungi    | 100 | Q1GBV6 | bacOther | 90  |
| Q1PE43 | plant    | 85  | B5Z5Q4 | bacOther | 90  | Q4KF11 | bacA     | 86  |
| A1UBV4 | bacB     | 88  | B9IQG8 | plant    | 90  | A5A8U2 | plant    | 87  |
| B1VAS8 | bacOther | 89  | Q40935 | plant    | 91  | A1VLW1 | bacOther | 89  |
| A9NMH6 | plant    | 90  | B9BX23 | bacOther | 88  | Q1AMF5 | animal   | 83  |
| A9UEY9 | animal   | 84  | Q40936 | plant    | 91  | Q5P285 | bacOther | 90  |
| Q2LU35 | bacOther | 89  | Q6XBS2 | plant    | 90  | A4YFP5 | archae   | 68  |
| A7P6D4 | plant    | 94  | A7HFL1 | bacOther | 89  | B0ML21 | bacOther | 92  |
| A9ZKL8 | bacB     | 89  | A1DEG0 | fungi    | 92  | A5IEW2 | bacOther | 89  |
| B1I3T2 | bacOther | 89  | A8WY18 | animal   | 82  | B0ML22 | bacOther | 92  |
| A8C8V8 | animal   | 83  | B3I5J9 | bacA     | 86  | Q2YZ46 | bacOther | 86  |
| Q96489 | plant    | 90  | B3I5J8 | bacA     | 86  | A8U8N9 | bacB     | 90  |
| A8KUB3 | bacOther | 88  | Q9ZSX7 | plant    | 94  | A7VDD3 | bacOther | 91  |

|        |          |     |        |          |     |        |          |     |
|--------|----------|-----|--------|----------|-----|--------|----------|-----|
| C4QAN1 | animal   | 83  | Q07NG0 | bacOther | 87  | Q607M7 | bacOther | 89  |
| B4PEX9 | animal   | 94  | C2YA68 | bacOther | 90  | Q9RNW7 | bacOther | 90  |
| C2XB98 | bacOther | 92  | A9NY56 | plant    | 90  | B5MGV8 | bacA     | 86  |
| C2DJU4 | bacA     | 86  | B5P171 | bacA     | 86  | B4G197 | plant    | 90  |
| B1ZWT6 | bacOther | 88  | B6FU63 | bacOther | 92  | B5IP54 | bacOther | 89  |
| B9IZQ3 | bacOther | 92  | A4W4S4 | bacA     | 86  | Q9RNW3 | bacOther | 90  |
| C3N161 | archae   | 75  | B8BFT1 | plant    | 85  | B2S8F5 | bacA     | 89  |
| A0YUX0 | bacOther | 89  | B0VEU3 | bacOther | 90  | B4RI08 | bacOther | 86  |
| B9CPV8 | bacOther | 86  | B5RG18 | bacA     | 86  | Q81QZ9 | bacOther | 90  |
| Q2P788 | bacOther | 89  | P02475 | animal   | 83  | A9ASQ2 | bacB     | 90  |
| Q2LGT3 | archae   | 79  | A5BGB7 | plant    | 90  | Q0SYM9 | bacA     | 86  |
| Q0WQZ8 | plant    | 90  | Q1MX15 | animal   | 83  | C1ZSA2 | bacOther | 89  |
| A7Q7Q1 | plant    | 91  | A0L7B6 | bacB     | 89  | B0FFN6 | plant    | 90  |
| B3E7I6 | bacOther | 89  | C1BQM9 | animal   | 92  | A8WY04 | animal   | 82  |
| A1KK77 | bacB     | 88  | B7CLI1 | bacB     | 91  | Q046M7 | bacOther | 90  |
| A0ACP1 | bacB     | 89  | B7CLI0 | bacOther | 88  | B5XB32 | animal   | 87  |
| C3NFM4 | archae   | 87  | Q7D412 | bacA     | 85  | A8ZNK2 | bacOther | 89  |
| Q66M65 | animal   | 83  | Q9WYK7 | bacOther | 89  | O82012 | plant    | 90  |
| A0Q8Q4 | bacB     | 87  | C4KV47 | bacOther | 88  | O82013 | plant    | 90  |
| B9BX22 | bacOther | 91  | A5B3G4 | plant    | 90  | O82010 | plant    | 90  |
| B3WBI7 | bacOther | 90  | B2FH45 | plant    | 90  | O82011 | plant    | 90  |
| Q88HW9 | bacOther | 89  | A2VRD4 | bacOther | 88  | A5J903 | bacB     | 91  |
| B5C573 | bacA     | 86  | A2VRD3 | bacOther | 91  | A5J902 | bacOther | 88  |
| Q1CD74 | bacA     | 86  | A6AUS1 | bacA     | 85  | A9P2P1 | plant    | 82  |
| A4WX24 | bacA     | 86  | B6KBD2 | other    | 95  | A9P235 | plant    | 91  |
| P23927 | animal   | 83  | A0YKV7 | bacOther | 89  | B1ZGC2 | bacA     | 84  |
| B9VTS0 | animal   | 83  | B5NDS6 | bacA     | 86  | A1U9H6 | bacB     | 90  |
| Q68X97 | bacOther | 85  | A6DE36 | bacOther | 89  | B5CPX4 | bacOther | 91  |
| C3F177 | bacOther | 90  | Q755Q9 | fungi    | 95  | A0NLC2 | bacOther | 90  |
| Q652V8 | plant    | 96  | A6GDD9 | bacOther | 73  | A3AGE0 | plant    | 90  |
| B3NCF0 | animal   | 111 | B2AC08 | fungi    | 131 | B4RI00 | bacOther | 88  |
| B9VTS8 | animal   | 83  | Q6K7E9 | plant    | 99  | B4UEC5 | bacOther | 89  |
| Q9HP50 | archae   | 91  | P70919 | bacOther | 86  | C3K047 | bacA     | 104 |
| A8KM01 | bacOther | 90  | C1QD82 | bacOther | 88  | Q2HAM9 | fungi    | 138 |
| A8KM00 | bacOther | 88  | P70917 | bacA     | 85  | C6T2N6 | plant    | 90  |
| P23928 | animal   | 83  | Q38806 | plant    | 90  | Q57FL3 | bacA     | 89  |
| B8IFP3 | bacA     | 84  | A6NZ93 | bacB     | 90  | B4NML7 | animal   | 128 |
| B1Y9Z3 | archae   | 75  | B5WJN8 | bacOther | 88  | C0U9B5 | bacB     | 87  |
| A7URP1 | animal   | 83  | B5WJN9 | bacOther | 89  | A3FPF5 | plant    | 94  |
| A7URP0 | animal   | 83  | C5MKK0 | plant    | 90  | B1I1Q9 | bacOther | 88  |
| B6JB06 | bacA     | 87  | B1L9B3 | bacOther | 89  | B2IEX3 | bacOther | 90  |
| Q6MHC0 | bacOther | 78  | Q6W1D1 | bacOther | 64  | Q9X3Z5 | bacOther | 90  |
| A3S7N7 | bacA     | 86  | B5WJN7 | bacB     | 92  | B7A7M5 | bacOther | 85  |
| B1H496 | bacOther | 90  | Q1ZUF5 | bacA     | 85  | A4R780 | fungi    | 137 |
| A5F489 | bacA     | 85  | Q10ZW9 | bacOther | 89  | Q13QP5 | bacOther | 88  |
| O80432 | plant    | 82  | B2FH58 | plant    | 77  | B3DXT5 | bacOther | 91  |
| B9N499 | plant    | 80  | B5P172 | bacA     | 86  | A7VSV2 | bacOther | 91  |
| B7IV85 | bacOther | 91  | A4RQ46 | fungi    | 150 | B4BD51 | bacOther | 88  |
| C4HG53 | bacA     | 86  | C1TAJ0 | bacOther | 77  | C4ANX3 | bacB     | 91  |
| B7GSP7 | bacOther | 91  | Q10ZW7 | bacOther | 89  | B1YAC1 | archae   | 75  |
| B3N922 | animal   | 91  | Q10ZW6 | bacOther | 89  | Q16S81 | animal   | 83  |
| Q9XGS6 | plant    | 90  | C0WZY1 | bacOther | 90  | Q16S83 | animal   | 83  |
| B3NCF2 | animal   | 94  | B6JCN0 | bacA     | 90  | B3LB99 | other    | 96  |
| C2JHV8 | bacA     | 85  | B2SNJ9 | bacOther | 89  | Q9HHW1 | archae   | 79  |
| Q8A8R3 | bacOther | 92  | A3NZ89 | bacOther | 88  | Q73ZA7 | bacOther | 87  |
| B5XBY4 | animal   | 83  | B4QN52 | animal   | 90  | Q73ZA5 | bacB     | 87  |
| B4LMP4 | animal   | 93  | B5YI86 | bacOther | 89  | B4F976 | plant    | 90  |
| B0H718 | bacA     | 86  | B4QN50 | animal   | 83  | B5K7Q1 | bacA     | 86  |
| B9PKY2 | other    | 95  | A4BUZ7 | bacB     | 89  | C4I401 | bacB     | 90  |
| Q3T149 | animal   | 83  | B3BUL8 | bacA     | 86  | A8NLM9 | fungi    | 91  |
| C2A4D7 | bacOther | 84  | A6TFZ0 | bacA     | 86  | B3NCE8 | animal   | 84  |
| Q5MCL3 | bacOther | 81  | B0SS63 | bacOther | 88  | A5C6B0 | plant    | 90  |
| B4RI07 | bacOther | 87  | Q47PQ5 | bacOther | 88  | C3H0J4 | bacOther | 92  |
| B9KZV1 | bacOther | 89  | B5FEV7 | bacA     | 86  | A4Z153 | bacA     | 88  |
| A8HNU9 | plant    | 121 | Q1R4Q0 | bacA     | 86  | B6I3S0 | bacA     | 86  |
| B0H717 | bacA     | 86  | B3BUL7 | bacA     | 86  | B9SMA2 | plant    | 90  |
| C4HG54 | bacA     | 86  | B6A1D5 | bacA     | 85  | B6JHC8 | bacB     | 89  |
| Q1J127 | bacOther | 88  | C3R2S0 | bacOther | 92  | B7KTG1 | bacA     | 87  |
| B3ENM6 | bacB     | 89  | B3YJK9 | bacOther | 88  | A9P1C1 | plant    | 90  |
| Q89LA9 | bacB     | 89  | Q88SP7 | bacOther | 90  | B9HT33 | plant    | 90  |
| A6CA38 | bacOther | 90  | A7FUI4 | bacOther | 88  | Q2TXY8 | fungi    | 90  |
| A1RJ61 | bacA     | 86  | C3RP50 | bacOther | 91  | Q3J669 | bacA     | 86  |
| Q3SNF2 | bacOther | 73  | C2R7N9 | bacOther | 92  | A9D1L3 | bacA     | 88  |
| Q3SNF1 | bacOther | 87  | Q4V3R7 | animal   | 116 | B4QAX2 | animal   | 93  |
| C1BVY5 | animal   | 84  | Q607M9 | bacB     | 91  | B1M6Q3 | bacA     | 90  |
| Q1Q0W8 | bacB     | 89  | Q607M8 | bacOther | 88  | A9NPZ7 | plant    | 92  |

|        |          |     |        |          |     |        |          |     |
|--------|----------|-----|--------|----------|-----|--------|----------|-----|
| Q3SNF5 | bacA     | 85  | B6KKL2 | other    | 94  | A3WSU3 | bacA     | 85  |
| B4MN44 | animal   | 84  | Q9ZDQ3 | bacOther | 85  | A9M7A8 | bacA     | 89  |
| Q3IJ57 | bacA     | 88  | B9RL39 | plant    | 80  | A6BKD2 | bacOther | 91  |
| Q0CEJ2 | fungi    | 92  | Q6LW17 | bacA     | 86  | B4MN48 | animal   | 95  |
| C1NBK1 | bacOther | 89  | Q1PVQ2 | bacOther | 89  | B4MN45 | animal   | 106 |
| C2I247 | bacA     | 85  | C3F165 | bacOther | 91  | Q0W782 | archae   | 89  |
| Q92VB0 | bacOther | 87  | A9VVZ8 | bacA     | 87  | A3MPF5 | bacB     | 91  |
| Q3IJ58 | bacA     | 88  | Q1DDC1 | bacOther | 89  | Q215C3 | bacOther | 87  |
| Q12MB8 | bacA     | 88  | Q6G5E9 | bacA     | 89  | B4MN41 | animal   | 83  |
| A6BWH0 | bacA     | 86  | Q000T3 | animal   | 83  | B1FD38 | bacOther | 88  |
| C1HSW1 | bacA     | 86  | O59514 | archae   | 89  | B4MN43 | animal   | 92  |
| Q1QSF8 | bacOther | 93  | Q3A7L5 | bacOther | 89  | P05477 | plant    | 90  |
| Q1QSF9 | bacOther | 88  | B0NTK3 | bacOther | 92  | A6GDE0 | bacOther | 88  |
| Q5DED1 | animal   | 83  | B1CB98 | bacB     | 91  | A0LJ28 | bacOther | 87  |
| C2PVG9 | bacOther | 93  | C3X6V1 | bacOther | 89  | Q6GE45 | bacOther | 86  |
| B3NCE5 | animal   | 116 | Q47QL7 | bacOther | 87  | P05478 | plant    | 90  |
| A8N4X3 | fungi    | 91  | B9RQ28 | plant    | 79  | B1XQB7 | bacOther | 89  |
| A3CJL3 | plant    | 82  | Q39RC3 | bacOther | 89  | Q8GV39 | plant    | 89  |
| B3AXF8 | bacA     | 86  | Q472U3 | bacB     | 90  | Q3JTX7 | bacOther | 90  |
| Q7QIZ9 | animal   | 83  | B5EBV7 | bacOther | 89  | A5P7P9 | bacA     | 104 |
| A6AHJ3 | bacA     | 85  | P0A5B7 | bacB     | 88  | C3EKB4 | bacOther | 90  |
| B4H1L8 | animal   | 95  | C4E0P4 | bacB     | 106 | Q16082 | animal   | 83  |
| B9HVV4 | plant    | 77  | B0Y732 | fungi    | 139 | Q5WTV9 | bacOther | 89  |
| A9SJI0 | plant    | 90  | Q4E663 | other    | 90  | Q8GV37 | plant    | 96  |
| C2DJU5 | bacA     | 86  | Q68DG0 | animal   | 80  | Q8GV36 | plant    | 96  |
| Q88LF1 | bacA     | 87  | Q1NNW6 | bacOther | 89  | Q8GV35 | plant    | 96  |
| B2JH61 | bacB     | 90  | P0A5B8 | bacB     | 88  | Q46E12 | archae   | 72  |
| Q6MA71 | bacOther | 87  | Q9VSX2 | animal   | 84  | Q38815 | plant    | 91  |
| B7FXQ8 | other    | 83  | B0WER2 | animal   | 83  | Q86I25 | other    | 116 |
| Q0ALQ6 | bacA     | 88  | B0WER0 | animal   | 83  | O53673 | bacB     | 97  |
| A2ST07 | archae   | 92  | B0WER1 | animal   | 83  | A0KDX1 | bacOther | 88  |
| Q18E08 | archae   | 90  | Q12329 | fungi    | 93  | B9AME3 | bacOther | 92  |
| Q69XV5 | plant    | 82  | A4KNR9 | bacB     | 97  | O64960 | plant    | 84  |
| B5QLF7 | bacOther | 90  | B9R0U1 | bacA     | 90  | Q94KM0 | plant    | 89  |
| A8ACK0 | bacA     | 86  | Q46E11 | archae   | 73  | B9S391 | plant    | 90  |
| B7NQY7 | bacA     | 86  | Q17102 | animal   | 85  | B9S392 | plant    | 90  |
| Q9HSS6 | archae   | 73  | Q3SGI5 | bacOther | 90  | B9S393 | plant    | 90  |
| A8XSJ6 | animal   | 82  | Q6G023 | bacA     | 88  | B9S395 | plant    | 90  |
| P80485 | bacOther | 90  | A5YJE5 | plant    | 90  | A9NYM3 | plant    | 90  |
| A6GNZ7 | bacA     | 85  | C6TKZ3 | plant    | 79  | B7ICZ9 | bacOther | 89  |
| Q47IE4 | bacOther | 90  | A4CCV3 | bacA     | 89  | A9S5S2 | plant    | 90  |
| B8M7E8 | fungi    | 158 | C2IXH3 | bacA     | 85  | C3N952 | archae   | 75  |
| A0B9M4 | archae   | 84  | A9MDG8 | bacA     | 88  | Q8TG38 | fungi    | 125 |
| A6WNX5 | bacA     | 86  | Q2YP08 | bacA     | 89  | Q98II6 | bacOther | 87  |
| B2FH49 | plant    | 85  | Q9XET1 | plant    | 90  | B4LH14 | animal   | 83  |
| Q11G10 | bacB     | 89  | C2FK47 | bacOther | 88  | Q40826 | plant    | 90  |
| B9HPA6 | plant    | 90  | C0D4C2 | bacOther | 90  | Q10P60 | plant    | 92  |
| B9HYD1 | plant    | 91  | B4L109 | animal   | 84  | C0GJK2 | bacOther | 89  |
| A4EXD4 | bacA     | 86  | Q8EET9 | bacA     | 86  | Q5SHV9 | bacOther | 89  |
| Q0VNM3 | bacA     | 87  | C3H0K5 | bacOther | 90  | A9NN36 | plant    | 76  |
| A8XV10 | animal   | 82  | A2PUK5 | bacA     | 85  | A3NZ90 | bacB     | 91  |
| Q2W556 | bacA     | 86  | Q00649 | animal   | 83  | B6TTC8 | plant    | 90  |
| C8CBN5 | animal   | 91  | Q9PBB0 | bacOther | 89  | C4GZC1 | bacA     | 86  |
| Q0ZLZ4 | animal   | 83  | Q1QM22 | bacB     | 89  | C4GZC0 | bacA     | 86  |
| C1Q5Y1 | bacB     | 88  | C0WBL1 | bacOther | 91  | Q98II5 | bacA     | 85  |
| A8XV11 | animal   | 82  | B7KV94 | bacA     | 84  | A9PE56 | plant    | 81  |
| Q604K7 | bacB     | 89  | B5N0S9 | bacA     | 86  | B8D8E3 | bacOther | 88  |
| A8EEY2 | bacOther | 90  | A3SQG5 | bacA     | 86  | Q2JDT4 | bacOther | 90  |
| A8EEY3 | bacOther | 88  | A7IJ68 | bacA     | 88  | Q1D4I0 | bacOther | 89  |
| A8XV12 | animal   | 82  | A0MWF1 | plant    | 90  | Q0BUB1 | bacOther | 86  |
| C1V6Z4 | archae   | 89  | C4CHL2 | bacOther | 92  | B2H0I1 | bacB     | 91  |
| C3KMX0 | bacOther | 89  | Q7YWK0 | animal   | 82  | A5I2N2 | bacOther | 88  |
| C3KMX1 | bacOther | 88  | Q3SIX7 | bacOther | 89  | B7K4Y3 | bacOther | 89  |
| C3KMX2 | bacOther | 89  | A2XEX0 | plant    | 90  | B2H0I2 | bacOther | 88  |
| C1V6Z3 | archae   | 93  | A2XEX1 | plant    | 90  | A4EEB5 | bacA     | 86  |
| C1YN50 | bacOther | 87  | A9R4H2 | bacA     | 86  | Q4LBZ8 | bacOther | 92  |
| Q6CD64 | fungi    | 93  | C3N3M5 | archae   | 87  | C4INX5 | bacA     | 89  |
| B5G208 | animal   | 88  | A8MB44 | archae   | 75  | Q8THE4 | archae   | 72  |
| A0K688 | bacOther | 91  | A9RGK8 | plant    | 90  | A9T894 | plant    | 92  |
| Q0ZLZ3 | animal   | 100 | Q8UUZ6 | animal   | 83  | B5XCL5 | animal   | 87  |
| A0K687 | bacOther | 88  | B1I4G5 | bacOther | 90  | Q3A9G8 | bacB     | 90  |
| C2F915 | bacOther | 90  | B9CG20 | bacOther | 85  | A4IJW6 | bacOther | 88  |
| A8EAQ6 | bacB     | 90  | B7NF04 | bacA     | 86  | C3RDB9 | bacOther | 93  |
| Q3JIL4 | bacB     | 90  | B7NF03 | bacA     | 86  | B5DFY5 | animal   | 83  |
| Q5ENZ0 | animal   | 83  | Q1QRS9 | bacA     | 92  | Q3B693 | bacB     | 89  |
| A1UXF5 | bacB     | 90  | A1T4V8 | bacB     | 88  | C4B4U5 | animal   | 83  |

|        |          |     |        |          |     |        |          |     |
|--------|----------|-----|--------|----------|-----|--------|----------|-----|
| Q10NK9 | plant    | 90  | C3FJQ8 | bacOther | 91  | C0QVM2 | bacOther | 99  |
| Q5FMH4 | bacOther | 90  | A7JF86 | bacB     | 87  | Q9HP75 | archae   | 87  |
| A3D568 | bacA     | 86  | Q2H8B0 | fungi    | 166 | C4J494 | plant    | 90  |
| Q10NK3 | plant    | 90  | A1CLF4 | fungi    | 126 | B3AGV5 | bacA     | 86  |
| Q10NK2 | plant    | 90  | Q5B0Z9 | fungi    | 148 | Q26947 | archae   | 89  |
| Q10NK1 | plant    | 90  | A4YGA0 | archae   | 87  | Q7PCM8 | animal   | 90  |
| B4GHU4 | animal   | 128 | A6WVA1 | bacA     | 89  | C1BEB6 | bacOther | 87  |
| Q2IDH5 | bacOther | 89  | B1KQJ8 | bacA     | 86  | C4CVV2 | bacOther | 93  |
| B4SOS7 | bacA     | 91  | B9SE69 | plant    | 95  | B3PU08 | bacA     | 84  |
| C0G910 | bacA     | 88  | B5ED45 | bacOther | 88  | B3PU09 | bacOther | 87  |
| C3LP91 | bacA     | 85  | C6T116 | plant    | 92  | C2EQJ9 | bacOther | 90  |
| Q0HJE5 | bacA     | 86  | Q1LU49 | bacOther | 92  | B6K8V8 | other    | 95  |
| B9GPN0 | plant    | 82  | Q127W4 | bacOther | 74  | O34321 | bacOther | 86  |
| P70918 | bacA     | 85  | C3QYQ3 | bacOther | 92  | A7R0M1 | plant    | 80  |
| B3EGS0 | bacOther | 89  | B6QBD8 | fungi    | 101 | P68282 | animal   | 83  |
| B4IYY2 | animal   | 84  | B7FMD9 | plant    | 90  | Q8ZVI0 | archae   | 88  |
| B9SSG1 | plant    | 83  | A8RAG0 | bacB     | 91  | B4SD99 | bacB     | 89  |
| A7QY87 | plant    | 82  | A4FYB5 | archae   | 90  | Q6A9S3 | bacOther | 88  |
| A7QY88 | plant    | 82  | Q749R4 | bacOther | 89  | Q30XK2 | bacOther | 89  |
| A7MPY9 | bacA     | 86  | C1DSQ9 | bacA     | 91  | Q6CJG1 | fungi    | 95  |
| B8EMT0 | bacA     | 90  | A4MH11 | bacOther | 90  | B0XZX3 | fungi    | 124 |
| Q9ZS24 | plant    | 90  | A4MH12 | bacOther | 88  | A3PT33 | bacB     | 90  |
| C4QAM8 | animal   | 73  | A8F137 | bacOther | 85  | Q02PT9 | bacA     | 87  |
| C4QAM9 | animal   | 83  | Q2UMF7 | fungi    | 143 | A6USD0 | archae   | 90  |
| B2D2G4 | plant    | 88  | Q1GW59 | bacOther | 88  | B7UMF4 | bacA     | 86  |
| B8IBB5 | bacB     | 87  | Q1GW58 | bacOther | 89  | B3Q3L7 | bacOther | 85  |
| C4QAM4 | animal   | 83  | A8ACJ9 | bacA     | 86  | P68284 | animal   | 83  |
| Q645R1 | animal   | 83  | B0ML08 | bacOther | 92  | A4SH54 | bacA     | 85  |
| Q1N5J3 | bacOther | 89  | C3LJL7 | bacOther | 91  | Q2NAA8 | bacA     | 104 |
| B7BA63 | bacOther | 92  | C1M216 | animal   | 73  | Q0FLW4 | bacA     | 86  |
| Q8KEP2 | bacOther | 89  | C2K1C1 | bacOther | 90  | A3Z2E5 | bacOther | 89  |
| O52192 | bacOther | 90  | C2GG58 | bacOther | 88  | B0CJ23 | bacA     | 89  |
| O52190 | bacOther | 90  | Q2BML8 | bacA     | 86  | A9NSY4 | plant    | 96  |
| B4TMX6 | bacA     | 86  | Q13ZX0 | bacOther | 91  | Q21062 | animal   | 82  |
| B7C7Z6 | bacOther | 87  | Q28LZ5 | bacOther | 86  | A3JR95 | bacA     | 86  |
| C2FQM0 | bacOther | 90  | Q3YWC6 | bacA     | 86  | B9SWM7 | plant    | 90  |
| B4Q8N8 | animal   | 91  | Q3YWC5 | bacA     | 86  | Q07TU1 | bacA     | 87  |
| C4M4U3 | other    | 87  | Q00SF7 | plant    | 97  | A5JV83 | animal   | 86  |
| Q82T55 | bacOther | 89  | Q5S1U1 | animal   | 83  | A8UL15 | bacOther | 90  |
| A9P1P3 | plant    | 91  | B8JCV4 | bacOther | 89  | A6C3F8 | bacOther | 93  |
| C1BNN7 | animal   | 92  | P34328 | animal   | 83  | B4QMS5 | animal   | 116 |
| A0LKU5 | bacOther | 88  | C0Y6K1 | bacOther | 88  | B8DSE0 | bacB     | 85  |
| Q5AUY8 | fungi    | 127 | Q5H9M9 | animal   | 94  | Q96458 | plant    | 90  |
| B4I777 | animal   | 124 | C1ASG3 | bacOther | 87  | C1BQF4 | animal   | 92  |
| A1U646 | bacOther | 89  | Q9XIE3 | plant    | 90  | C1ME19 | bacA     | 86  |
| Q76NU5 | other    | 148 | A9NQG6 | plant    | 82  | B3YT47 | bacOther | 91  |
| A6T455 | bacA     | 86  | B5ZE07 | bacOther | 87  | Q9K4W0 | bacOther | 89  |
| A9KFM9 | bacB     | 89  | B7VGI8 | bacA     | 85  | Q66KY8 | animal   | 83  |
| Q2NKA9 | bacOther | 89  | Q3J7L3 | bacOther | 89  | B5MZS3 | bacOther | 88  |
| C4ESC1 | bacOther | 89  | Q3J7L2 | bacOther | 89  | A7JEZ3 | bacB     | 87  |
| A2WRY7 | plant    | 74  | B1M1T9 | bacA     | 85  | Q48KA2 | bacA     | 87  |
| A2WRY5 | plant    | 86  | B0Q3H2 | bacOther | 90  | A5GPG4 | bacOther | 96  |
| C3R7G3 | bacOther | 96  | B4TFM8 | bacOther | 88  | Q8Z9V6 | bacA     | 86  |
| Q1WDN9 | animal   | 86  | Q0GC56 | animal   | 83  | B6Q7Z4 | fungi    | 148 |
| Q1WDN8 | animal   | 86  | A4BTG1 | bacOther | 89  | B9PGE9 | other    | 95  |
| A1R411 | bacOther | 88  | Q1H253 | bacOther | 66  | Q4UKR8 | bacOther | 89  |
| A5FDF8 | bacOther | 90  | Q9A2G9 | bacOther | 90  | Q4UKR7 | bacOther | 85  |
| A5C6A9 | plant    | 90  | B9GXR5 | plant    | 94  | B2G8H3 | bacOther | 90  |
| Q15RT9 | bacA     | 87  | B5RG17 | bacA     | 86  | Q16JG8 | animal   | 83  |
| Q2Y862 | bacOther | 89  | Q06EY3 | animal   | 83  | Q9ZSR6 | plant    | 92  |
| C1A981 | bacOther | 89  | B1ZJ37 | bacA     | 86  | Q94GC5 | plant    | 79  |
| Q2LYH4 | bacOther | 89  | B5KBA9 | bacA     | 90  | B7KQ11 | bacA     | 86  |
| C1ETC8 | bacOther | 90  | B2JR94 | bacOther | 89  | C6T1D0 | plant    | 90  |
| Q0KA57 | bacOther | 90  | C1C0M7 | animal   | 83  | A2TUE0 | bacOther | 90  |
| C0G3T6 | bacA     | 89  | B2JR93 | bacOther | 88  | Q5R1P7 | animal   | 83  |
| A0PN37 | bacOther | 93  | A9K3M8 | bacOther | 90  | A9NKY0 | plant    | 86  |
| B5V071 | bacOther | 90  | Q3A7M7 | bacOther | 88  | Q0RIJ5 | bacOther | 87  |
| P0C058 | bacA     | 86  | C2T0Z5 | bacOther | 92  | C7BVR3 | animal   | 82  |
| Q0FDC5 | bacA     | 87  | B5Q031 | bacOther | 88  | Q9SXZ0 | plant    | 89  |
| A7P106 | plant    | 91  | B1HHR7 | bacOther | 90  | B6TQD6 | plant    | 96  |
| Q5XJD0 | animal   | 80  | Q2A147 | bacOther | 87  | A5IDZ0 | bacA     | 87  |
| A2SFL9 | bacOther | 90  | A4IQ30 | bacOther | 90  | B8CZF2 | bacOther | 88  |
| A9MWJ6 | bacA     | 86  | Q012E4 | plant    | 99  | P24632 | plant    | 90  |
| A9MWJ7 | bacA     | 86  | B4QN53 | animal   | 111 | P24631 | plant    | 89  |
| Q2FVN2 | bacOther | 86  | A7QRP2 | plant    | 90  | A8DR35 | plant    | 85  |
| B4RED2 | bacB     | 89  | A7QRP1 | plant    | 90  | B0ET55 | other    | 84  |



|        |          |     |        |          |     |
|--------|----------|-----|--------|----------|-----|
| B4A4X1 | bacA     | 86  | B6T2J9 | plant    | 90  |
| B4A4X0 | bacA     | 86  | A3MIL4 | bacOther | 90  |
| B9HHJ3 | plant    | 90  | Q1CD75 | bacA     | 86  |
| A4S8A2 | plant    | 99  | B4UKF4 | bacOther | 89  |
| Q1AMF6 | animal   | 83  | B1L3F9 | archae   | 73  |
| Q1AMF7 | animal   | 83  | B6IW95 | bacA     | 85  |
| B1Y9D3 | archae   | 88  | Q6Z6L5 | plant    | 97  |
| Q6CQF7 | fungi    | 93  | A3MIL3 | bacOther | 88  |
| A8L1Y9 | bacOther | 90  | Q9PUR2 | animal   | 83  |
| Q6SJQ8 | animal   | 142 | B2W1D8 | fungi    | 200 |
| B5C574 | bacA     | 86  | C1ETB6 | bacOther | 91  |
| Q30T88 | bacOther | 89  | Q974V6 | archae   | 73  |
| B7RMY8 | bacA     | 86  | Q8MMN1 | other    | 154 |
| B9QE19 | other    | 94  | A1WZ40 | bacOther | 89  |
| C2TWX1 | bacOther | 92  | A7T2X8 | animal   | 97  |
| B4KHI6 | animal   | 91  | B3KQL3 | animal   | 80  |
| Q30T87 | bacOther | 90  | A9S018 | plant    | 86  |
| B8DIS6 | bacOther | 85  | A3CX48 | archae   | 90  |
| B9H7S6 | plant    | 95  | B8GSY7 | bacOther | 89  |
| B9R659 | bacA     | 86  | C4KF22 | archae   | 87  |
| C0BAE3 | bacOther | 92  | Q57V53 | other    | 90  |
| C0BAE2 | bacB     | 91  | A8P845 | animal   | 83  |
| Q5E4T5 | bacA     | 86  | B4TA61 | bacA     | 86  |
| Q03U39 | bacB     | 90  | B4TA60 | bacA     | 86  |
| C3QDE3 | bacOther | 92  | A7ZTP0 | bacA     | 86  |
| C3MU73 | archae   | 75  | B3ZA61 | bacOther | 90  |
| Q5VRY1 | plant    | 94  | C0QIP5 | bacOther | 89  |
| B9JZK1 | bacA     | 91  | B7HQ44 | bacOther | 92  |
| C4WSK0 | animal   | 83  | B4MN46 | animal   | 111 |
| A6L6R8 | bacOther | 93  | Q3ADV9 | bacOther | 90  |
| B6U6V5 | plant    | 91  | Q58GG5 | bacOther | 89  |
| Q5DI11 | animal   | 83  | P05812 | animal   | 110 |
| Q2IHQ7 | bacOther | 89  | C0K035 | bacOther | 93  |
| C2UDD0 | bacOther | 90  | P05811 | animal   | 83  |
| P46254 | plant    | 84  | B3HA31 | bacA     | 86  |
| C2WLX3 | bacOther | 92  | B7N2D2 | bacA     | 86  |
| A8POX0 | animal   | 83  | B8LM67 | plant    | 91  |
| B5QX88 | bacOther | 88  | A8WY05 | animal   | 82  |
| A2SHG1 | bacOther | 91  | Q08V45 | bacOther | 89  |
| P42930 | animal   | 83  | Q06EY2 | animal   | 83  |
| P42931 | animal   | 87  | C0VRF8 | bacOther | 88  |
| B5UU71 | bacOther | 90  | A9NDP5 | bacB     | 89  |
| Q98IT5 | bacOther | 87  | Q9SHJ1 | plant    | 86  |
| B2YI77 | archae   | 87  | A5A8T6 | plant    | 89  |
| A5B3K5 | plant    | 90  | A6UD15 | bacA     | 87  |
| A5B3K6 | plant    | 80  | B8M0J1 | fungi    | 101 |
| A4KIH4 | bacB     | 88  | B1N202 | bacOther | 88  |
| C1BU38 | animal   | 84  | B3K3L8 | bacB     | 90  |
| Q5TWA3 | animal   | 116 | C2YR86 | bacOther | 92  |
| Q3EM33 | bacOther | 91  | Q052T2 | bacOther | 87  |
| C4M7B0 | other    | 87  | Q1GW60 | bacOther | 89  |
| B0A7M1 | bacOther | 91  | A7A326 | bacOther | 91  |
| B0A7M0 | bacOther | 91  | A5Z9G6 | bacOther | 91  |
| B3VMZ8 | other    | 97  | Q1GW65 | bacA     | 87  |
| B3VMZ9 | other    | 97  | Q1GW66 | bacOther | 87  |
| A9P0Z1 | plant    | 82  | A5A8T5 | plant    | 89  |
| A9L3Q0 | bacA     | 86  | A7ZTP1 | bacA     | 86  |
| Q9FY38 | plant    | 90  | Q9BHC0 | other    | 95  |
| A1ZJ14 | bacOther | 96  | B0UG17 | bacOther | 91  |
| C3NTM2 | bacA     | 85  | C3NME5 | archae   | 75  |
| Q9SWE4 | plant    | 90  | A9NLE2 | plant    | 82  |
| C1SRV5 | bacOther | 88  | O81822 | plant    | 91  |
| C1SRV4 | bacB     | 85  | A5CST5 | bacOther | 88  |
| B5D2J0 | bacOther | 92  | Q5LMS8 | bacA     | 86  |
| Q2JUK4 | bacOther | 89  | Q13ZW0 | bacOther | 95  |
| Q9GT43 | animal   | 81  | C0YQ53 | bacOther | 90  |
| Q5FW72 | animal   | 80  |        |          |     |
| A8TSP0 | bacA     | 85  |        |          |     |
| A9NLK7 | plant    | 90  |        |          |     |
| B2J4L6 | bacOther | 89  |        |          |     |
| A9P1S2 | plant    | 90  |        |          |     |
| Q9P9K5 | archae   | 89  |        |          |     |
| A3VC52 | bacA     | 86  |        |          |     |
| A8UZP7 | bacOther | 86  |        |          |     |
| B7K5D6 | bacOther | 89  |        |          |     |
| B8BFT0 | plant    | 85  |        |          |     |
